# Supplementary material for: Subgingival Microbiota and Cytokines Profile Changes in Patients with Periodontitis: A Pilot Study Comparing Healthy and Diseased Sites in the Same Oral Cavities
Source: MDPI journal article supplement (doi:10.3390/microorganisms9112364), 2021-11-16
Supplement: s1 [file s1]

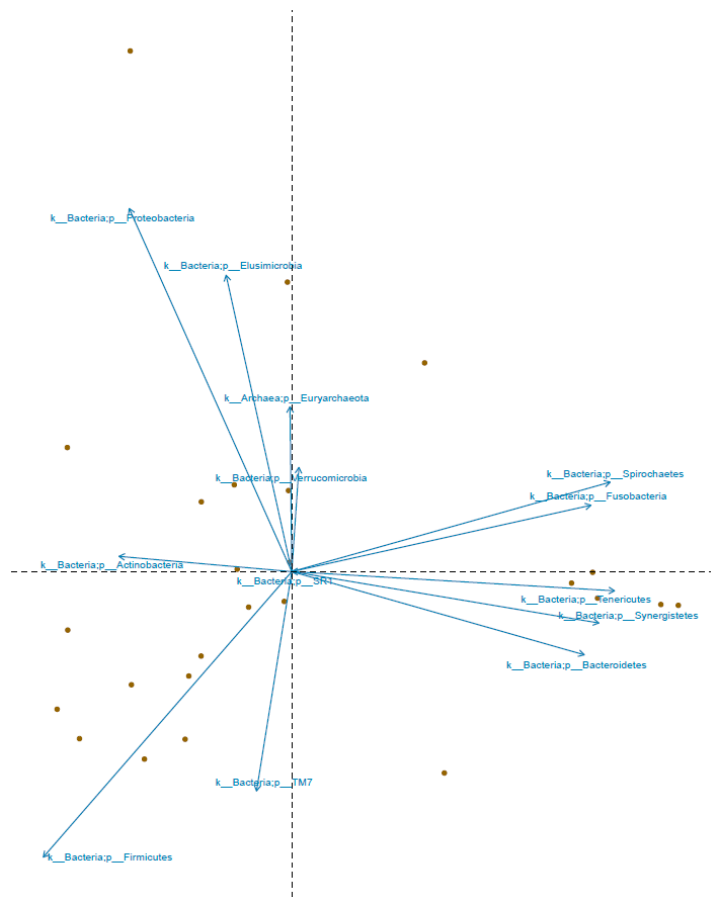

**Figure S1** - Compositional biplot, that simultaneously displays the sample clustering, with each point representing a single sample of the healthy sites, and the important taxa identified at phylum level. This plot showed that healthy sites samples were mainly driven by Firmicutes and TM7.

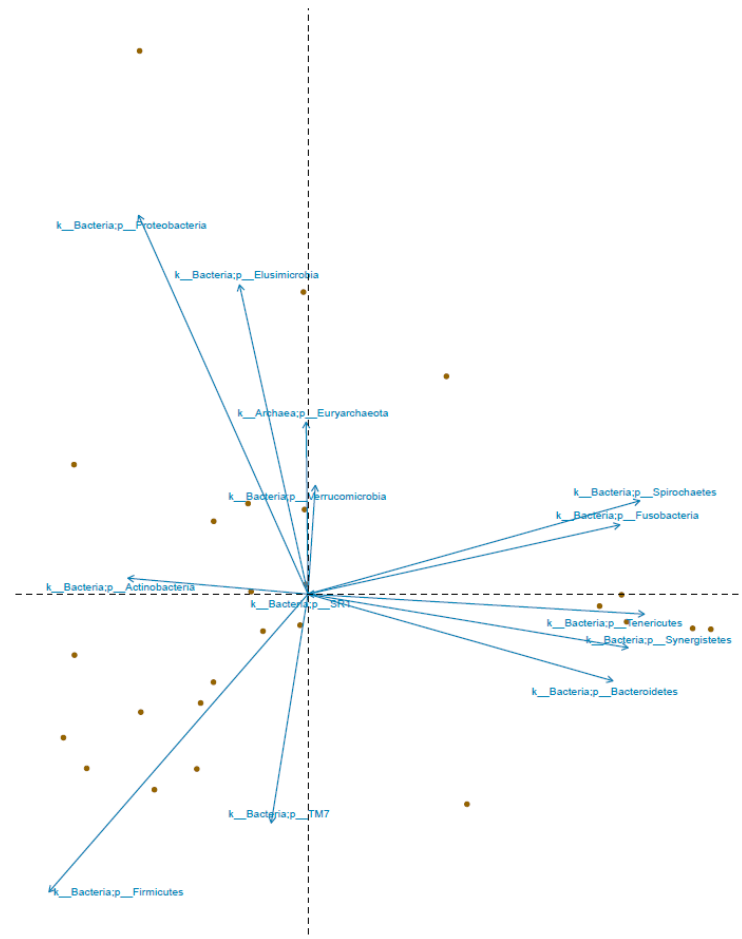

**Figure S2** - Compositional biplot, that simultaneously displays the sample clustering, with each point representing a single sample of the healthy sites, and the important taxa identified at phylum level. This plot showed that diseased samples were mainly driven by Synergistetes and Bacteroidetes.

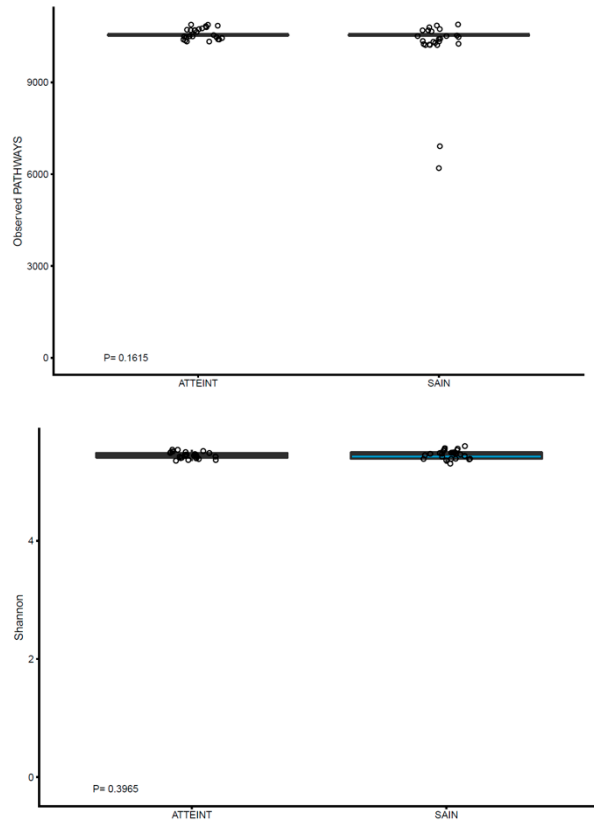

**Figure S3** - Alpha diversities of the predict metagenomic functions of the samples collected in periodontitis sites and healthy sites using (A) the total numbers of observed pathways and (B) the shannon index. Whiskers in the boxplot represent the range of minimum and maximum alpha diversity values within a population, excluding outliers. No tests yielded a significant difference.

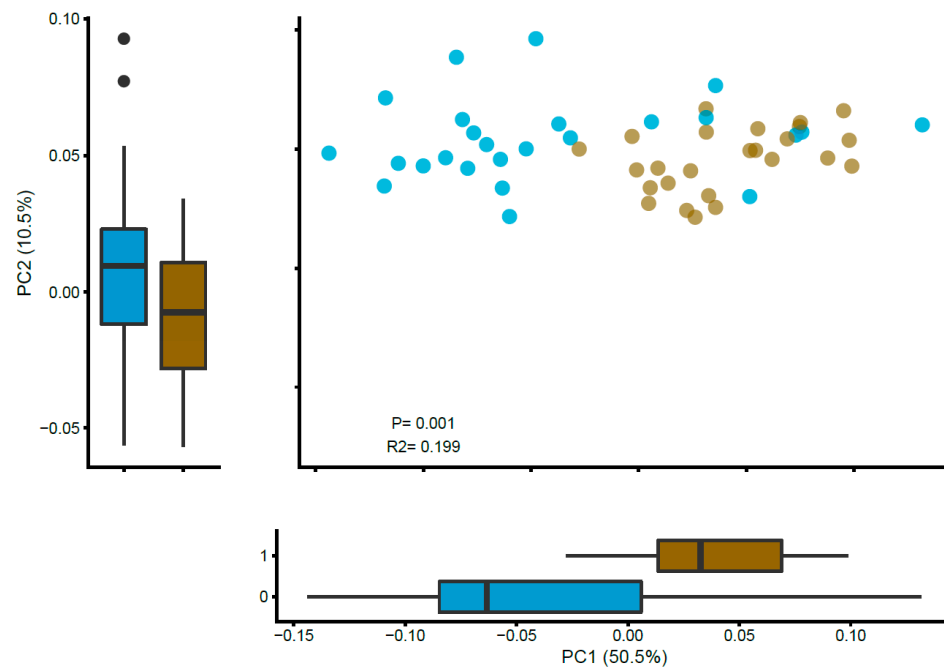

**Figure S4** - Functional diversity of the oral microbiomes of the predict metagenomic functions of the samples collected in periodontitis sites and healthy sites. Principal Coordinates Analysis of Bray–Curtis distances generated from pathways table. Proportion of variance explained by each principal coordinate axis is denoted in the corresponding axis label. The PCoA shows clear separation between faecal samples collected before chemotherapy and after chemotherapy.

| Feature                     | P value               | FDR corrected P value | mean relative abundance healthy sites | mean relative abundance diseased sites |
|-----------------------------|-----------------------|-----------------------|---------------------------------------|----------------------------------------|
| k_Bacteria;p_Synergistetes  | 0.0000127963181505418 | 0.000204741090408669  | 0.0130342887773651                    | 0.0436740765836695                     |
| k_Bacteria;p_Firmicutes     | 0.0000887786327270478 | 0.000473486041210921  | 0.381067316933096                     | 0.223589012028169                      |
| k_Bacteria;p_TM7            | 0.000478348082313356  | 0.0017440863141694    | 0.0245489811479369                    | 0.078776742131996                      |
| k_Bacteria;p_SR1            | 0.000545026973177937  | 0.0017440863141694    | 0                                     | 0.00215848238376248                    |
| k_Bacteria;p_Spirochaetes   | 0.000780787451612888  | 0.0020820998709677    | 0.0415370521086175                    | 0.0937275137812838                     |
| k_Bacteria;p_Bacteroidetes  | 0.00280773814974955   | 0.00641768719942754   | 0.189027028601388                     | 0.26581083203824                       |
| k_Bacteria;p_Proteobacteria | 0.0198939507675555    | 0.0397879015351109    | 0.198693091678517                     | 0.116957110402858                      |
| k_Bacteria;p_Tenericutes    | 0.0249433697703493    | 0.044343768480621     | 0.00237656679120939                   | 0.00412197754699422                    |
| k_Bacteria;p_Fusobacteria   | 0.0378658098717794    | 0.060585295794847     | 0.0765980599127453                    | 0.114318718130449                      |
| k_Bacteria;p_Actinobacteria | 0.0572392612793856    | 0.0832571073154699    | 0.0699247819222139                    | 0.0427055644726608                     |

**Table S1A.** Relative abundance of the most significant phyla in the samples collected in periodontitis sites and healthy sites as assessed by Mann-Whitney U tests with false-discovery-rate correction.

| Feature                                                                                  | P value               | FDR corrected P value | mean relative abundance healthy sites | mean relative abundance diseased sites |
|------------------------------------------------------------------------------------------|-----------------------|-----------------------|---------------------------------------|----------------------------------------|
| k_Bacteria;p_Firmicutes;c_Clostridia;o_Clostridiales;f_Veillonellaceae;g_Schwarztzia     | 0.0000100791304482579 | 0.00156341723298603   | 0.00185557988957733                   | 0.00750991065434733                    |
| k_Bacteria;p_Synergistetes;c_Synergistia;o_Synergistales;f_Dethiosulfovibrionaceae;g_TG5 | 0.0000198867513278845 | 0.00156341723298603   | 0.0130342887773651                    | 0.0412271032692709                     |
| k_Bacteria;p_TM7;c_TM7-3;o_;f_;g_                                                        | 0.0000203041199089094 | 0.00156341723298603   | 0.010056874230823                     | 0.0661263239468699                     |

|                                                                                                                 |                           |                         |                         |                          |
|-----------------------------------------------------------------------------------------------------------------|---------------------------|-------------------------|-------------------------|--------------------------|
| k__Bacteria;p__Firmicutes;c__Bacilli;o__Lactobacillales;f__Enterococcaceae;g__Enterococcus                      | 0.0000423272928<br>012977 | 0.00197192320<br>788367 | 0.0611968347072<br>659  | 0.0067640458085<br>4227  |
| k__Bacteria;p__Proteobacteria;c__Gammaproteobacteria;o__Pseudomonadales;f__Pseudomonadaceae;g__Pseudomonas      | 0.0000539704245<br>459434 | 0.00197192320<br>788367 | 0.0218921164835<br>223  | 0.0017384075274<br>9208  |
| k__Bacteria;p__Proteobacteria;c__Gammaproteobacteria;o__Enterobacteriales;f__Enterobacteriaceae;g__             | 0.0000715050908<br>165901 | 0.00197192320<br>788367 | 0.0176239620787<br>316  | 0.0020042577319<br>8034  |
| k__Bacteria;p__TM7;c__TM7-3;o__I025;f__Rs-045;g__                                                               | 0.0000737874573<br>352613 | 0.00197192320<br>788367 | 0.0014969570040<br>4925 | 0.0062578001646<br>5631  |
| k__Bacteria;p__Bacteroidetes;c__Bacteroidia;o__Bacteroidales;f__Porphyromonadaceae;g__Porphyromonas             | 0.0000744767000<br>457875 | 0.00197192320<br>788367 | 0.0193267612260<br>351  | 0.0728691569606<br>997   |
| k__Bacteria;p__Firmicutes;c__Clostridia;o__Clostridiales;f__Peptostreptococcaceae;g__Filifactor                 | 0.0000768281769<br>305324 | 0.00197192320<br>788367 | 0.0084088476681<br>549  | 0.0208988469218<br>348   |
| k__Bacteria;p__Actinobacteria;c__Coriobacteriia;o__Coriobacteriales;f__Coriobacteriaceae;g__                    | 0.0000960631906<br>447407 | 0.00205408678<br>164307 | 0.0009316035042<br>0155 | 0.0032945521519<br>6643  |
| k__Bacteria;p__Chloroflexi;c__Anaerolineae;o__Anaerolineales;f__Anaerolinaceae;g__SHD-231                       | 0.0001053864731<br>84199  | 0.00205408678<br>164307 | 0.0012735961597<br>049  | 0.0081025246077<br>8169  |
| k__Bacteria;p__Firmicutes;c__Clostridia;o__Clostridiales;f__[Mogibacteriaceae];g__Mogibacterium                 | 0.0001067058068<br>38601  | 0.00205408678<br>164307 | 0.0050095506772<br>3661 | 0.0095038250050<br>9464  |
| k__Bacteria;p__Bacteroidetes;c__Bacteroidia;o__Bacteroidales;f__Rikenellaceae;g__Blvii28                        | 0.0001176021760<br>56931  | 0.00207150644<br>368834 | 0.0017592820357<br>6694 | 0.0076522742306<br>1183  |
| k__Bacteria;p__Bacteroidetes;c__Bacteroidia;o__Bacteroidales;f__[Paraprevotellaceae];g__[Prevotella]            | 0.0001255458450<br>72021  | 0.00207150644<br>368834 | 0.0020949178058<br>4918 | 0.0183025040253<br>202   |
| k__Bacteria;p__Actinobacteria;c__Actinobacteria;o__Actinomycetales;f__Propionibacteriaceae;g__Propionibacterium | 0.0001549090278<br>28394  | 0.00238559902<br>855727 | 0.0016329210989<br>8592 | 0.0003590366130<br>51911 |

|                                                                                                                |                          |                         |                          |                          |
|----------------------------------------------------------------------------------------------------------------|--------------------------|-------------------------|--------------------------|--------------------------|
| k__Bacteria;p__Proteobacteria;c__Deltaproteobacteria;o__Desulfobacterales;f__Desulfobulbaceae;g__Desulfobulbus | 0.0001998637634<br>31739 | 0.00288553308<br>454574 | 0.0071943045826<br>5305  | 0.0235958213627<br>634   |
| k__Bacteria;p__Firmicutes;c__Clostridia;o__Clostridiales;f__Veillonellaceae;g__Dialister                       | 0.0002349559886<br>19876 | 0.00319263725<br>71289  | 0.0088365817206<br>8227  | 0.0234966617440<br>765   |
| k__Bacteria;p__Firmicutes;c__Clostridia;o__Clostridiales;f__Eubacteriaceae;g__Pseudoramibacter_Eubacterium     | 0.0002818016037<br>47826 | 0.00361645391<br>476377 | 0.0002800764848<br>04709 | 0.0008649958203<br>9246  |
| k__Bacteria;p__Firmicutes;c__Erysipelotrichi;o__Erysipelotrichales;f__Erysipelotrichaceae;g__Bulleidia         | 0.0003054348939<br>43592 | 0.00371344528<br>952473 | 0.0004514636911<br>67561 | 0.0021433557929<br>4333  |
| k__Bacteria;p__SR1;c__o__f__g__                                                                                | 0.0005450269731<br>77937 | 0.00608043884<br>00556  | 0                        | 0.0021584823837<br>6248  |
| k__Bacteria;p__Firmicutes;c__Bacilli;o__Lactobacillales;__                                                     | 0.0005527671672<br>77782 | 0.00608043884<br>00556  | 0.0544241252642<br>022   | 0.0075459491766<br>2256  |
| k__Bacteria;p__Tenericutes;c__RF3;o__ML615J-28;f__g__                                                          | 0.0006514536816<br>05986 | 0.00663728803<br>059029 | 0.0000924755239<br>1704  | 0.0005175439970<br>17256 |
| k__Bacteria;p__Firmicutes;c__Bacilli;o__Bacillales;f__[Exiguobacteraceae];g__                                  | 0.0006608555181<br>97302 | 0.00663728803<br>059029 | 0.0199636232701<br>272   | 0.0016985613939<br>5153  |
| k__Bacteria;p__Firmicutes;c__Clostridia;o__Clostridiales;f__Veillonellaceae;g__Selenomonas                     | 0.0007095423142<br>77409 | 0.00682934477<br>492006 | 0.0089533238781<br>5447  | 0.0197580145490<br>676   |
| k__Bacteria;p__Spirochaetes;c__Spirochaetes;o__Spirochaetales;f__Spirochaetaceae;g__Treponema                  | 0.0007807874516<br>12888 | 0.00721447605<br>290309 | 0.0414886629579<br>744   | 0.0934090274101<br>671   |
| k__Bacteria;p__Firmicutes;c__Clostridia;o__Clostridiales;f__Lachnospiraceae;g__Moryella                        | 0.0008640923260<br>60033 | 0.00754700663<br>591315 | 0.0002828163602<br>63572 | 0.0044839504837<br>3287  |
| k__Bacteria;p__Firmicutes;c__Clostridia;o__Clostridiales;f__Ruminococcaceae;g__Ethanoligenens                  | 0.0008979875085<br>12424 | 0.00754700663<br>591315 | 0.0172419272400<br>075   | 0.0024192194958<br>4356  |

|                                                                                                                     |                 |               |                 |                 |
|---------------------------------------------------------------------------------------------------------------------|-----------------|---------------|-----------------|-----------------|
| k__Bacteria;p__Firmicutes;c__Clostridia;o__Clostridiales;f__[Acidaminobacteraceae];g__                              | 0.0009147886831 | 0.00754700663 | 0.0033612059372 | 0.0080106682273 |
| —                                                                                                                   | 40988           | 591315        | 6106            | 9141            |
| k__Bacteria;p__Firmicutes;c__Clostridia;o__Clostridiales;f__[Mogibacteriaceae];g__                                  | 0.0010385521365 | 0.00827260494 | 0.0114692732410 | 0.0170527643927 |
|                                                                                                                     | 436             | 970939        | 886             | 847             |
| k__Bacteria;p__Proteobacteria;c__Epsilonproteobacteria;o__Campylobacteriales;f__Campylobacteraceae;g__Campylobacter | 0.0011046476841 | 0.00850578716 | 0.0131674572575 | 0.0282356117550 |
|                                                                                                                     | 6196            | 804706        | 732             | 576             |
| k__Bacteria;p__Actinobacteria;c__Coriobacteriia;o__Coriobacteriales;f__Coriobacteriaceae;g__Slackia                 | 0.0011921558662 | 0.00888348403 | 0.0002626946027 | 0.0011429658822 |
|                                                                                                                     | 2122            | 539036        | 75136           | 502             |
| k__Bacteria;p__TM7;c__TM7-3;o__CW040;f__F16;g__                                                                     | 0.0013940080421 | 0.01006299555 | 0.0001346918777 | 0.0018892255013 |
|                                                                                                                     | 6599            | 43857         | 98137           | 6516            |
| k__Bacteria;p__Firmicutes;c__Clostridia;o__Clostridiales;f__;g__                                                    | 0.0015807595412 | 0.01106531678 | 0.0026130982270 | 0.0069900316041 |
|                                                                                                                     | 5632            | 87943         | 1033            | 4388            |
| k__Bacteria;p__Firmicutes;c__Clostridia;o__Clostridiales;f__Lachnospiraceae;g__Catonella                            | 0.0017502784754 | 0.01189159787 | 0.0007060994077 | 0.0014405924183 |
|                                                                                                                     | 4265            | 72721         | 84039           | 1715            |
| k__Bacteria;p__Firmicutes;c__Clostridia;o__Clostridiales;f__Peptostreptococcaceae;g__Peptostreptococcus             | 0.0019166936878 | 0.01265017833 | 0.0004023448613 | 0.0014622964536 |
|                                                                                                                     | 6674            | 99205         | 23961           | 7025            |
| k__Bacteria;p__Actinobacteria;c__Coriobacteriia;o__Coriobacteriales;f__Coriobacteriaceae;g__Olsenella               | 0.0020803510996 | 0.01334891955 | 0.0005493995405 | 0.0014005042096 |
|                                                                                                                     | 2183            | 59067         | 26134           | 8871            |
| k__Bacteria;p__Firmicutes;c__Clostridia;o__Clostridiales;f__Lachnospiraceae;g__Clostridium                          | 0.0023676643420 | 0.01478190440 | 0.0026176805329 | 0.0000581791884 |
|                                                                                                                     | 0015            | 54604         | 6383            | 145145          |
| k__Bacteria;p__Firmicutes;c__Erysipelotrichi;o__Erysipelotrichales;f__Erysipelotrichaceae;g__Sharpea                | 0.0024888859374 | 0.01512980661 | 0               | 0.0005684948827 |
|                                                                                                                     | 8454            | 99718         |                 | 28101           |
| k__Bacteria;p__Bacteroidetes;c__Bacteroidia;o__Bacteroidales;__;__                                                  | 0.0026805463703 | 0.01571657686 | 0.0020078803021 | 0.0075089712819 |
|                                                                                                                     | 1222            | 4531          | 7186            | 7941            |



|                                                                                                                   |                         |                        |                           |                           |
|-------------------------------------------------------------------------------------------------------------------|-------------------------|------------------------|---------------------------|---------------------------|
| k__Bacteria;p__Firmicutes;c__Clostridia;o__Clostridiales;f__Veillonellaceae;g__                                   | 0.0027214851713<br>4736 | 0.01571657686<br>4531  | 0.0000369318181<br>818182 | 0.0004035719551<br>12187  |
| k__Bacteria;p__Firmicutes;c__Clostridia;o__Clostridiales;f__Lachnospiraceae;g__Oribacterium                       | 0.0028427352957<br>7778 | 0.01601638666<br>64553 | 0.0005324258302<br>92538  | 0.0016301772492<br>7436   |
| k__Bacteria;p__Bacteroidetes;c__Bacteroidia;o__Bacteroidales;f__Porphyromonadaceae;g__Tannerella                  | 0.0033646643214<br>9853 | 0.01850565376<br>82419 | 0.0305468604540<br>926    | 0.0534684578600<br>18     |
| k__Bacteria;p__Bacteroidetes;c__Sphingobacteriia;o__Sphingobacteriales;f__Sphingobacteriaceae;g__Pedobacter       | 0.0051454660145<br>2188 | 0.02764192207<br>80129 | 0.0003750032804<br>78809  | 0                         |
| k__Bacteria;p__Firmicutes;c__Clostridia;o__Clostridiales;f__Ruminococcaceae;g__Ruminococcus                       | 0.0087883097542<br>5357 | 0.04546152740<br>49267 | 0.0031725604308<br>3474   | 0.0000761432190<br>314789 |
| k__Bacteria;p__Firmicutes;c__Clostridia;o__Clostridiales;f__Lachnospiraceae;g__Lachnospira                        | 0.0088561417022<br>5845 | 0.04546152740<br>49267 | 0.0004055233052<br>98843  | 0.0016920908479<br>6847   |
| k__Bacteria;p__Proteobacteria;c__Gammaproteobacteria;o__Alteromonadales;f__[Chromatiaceae];g__Alishewanella       | 0.0099687409280<br>1338 | 0.04921678450<br>35    | 0.0066798545993<br>2246   | 0.0004459040628<br>55519  |
| k__Bacteria;p__Firmicutes;c__Clostridia;o__Clostridiales;f__Clostridiaceae;g__Clostridium                         | 0.0100748513880<br>316  | 0.04921678450<br>35    | 0.0056376593145<br>4027   | 0.0006087397387<br>28708  |
| k__Bacteria;p__Fusobacteria;c__Fusobacteriia;o__Fusobacteriales;f__Leptotrichiaceae;g__Leptotrichia               | 0.0103298131685<br>447  | 0.04921678450<br>35    | 0.0021245582723<br>576    | 0.0109927700858<br>195    |
| k__Bacteria;p__Proteobacteria;c__Epsilonproteobacteria;o__Campylobacteriales;f__Helicobacteraceae;g__Wolinella    | 0.0104399239855<br>909  | 0.04921678450<br>35    | 0                         | 0.0001148506406<br>06329  |
| k__Bacteria;p__Firmicutes;c__Clostridia;o__Clostridiales;f__Lachnospiraceae;g__Johnsonella                        | 0.0115558775330<br>482  | 0.05314215774<br>01816 | 0.0041412801111<br>3663   | 0.0093872564656<br>937    |
| k__Bacteria;p__Bacteroidetes;c__Sphingobacteriia;o__Sphingobacteriales;f__Sphingobacteriaceae;g__Sphingobacterium | 0.0117326841764<br>037  | 0.05314215774<br>01816 | 0.0025350840525<br>4652   | 0.0003881255168<br>00053  |

|                                                                                                                    |                        |                        |                          |                          |
|--------------------------------------------------------------------------------------------------------------------|------------------------|------------------------|--------------------------|--------------------------|
| k__Bacteria;p__Proteobacteria;c__Alphaproteobacteria;o__Sphingomonadales;f__Sphingomonadaceae;g__Novosphingobium   | 0.0122425901229<br>375 | 0.05438535227<br>68955 | 0.0163768680468<br>491   | 0.0020376046720<br>1337  |
| k__Bacteria;p__Proteobacteria;c__Gammaproteobacteria;o__Aeromonadales;f__Aeromonadaceae;g__Aeromonas               | 0.0126100379859<br>645 | 0.05496073159<br>92037 | 0.0115720285190<br>774   | 0.0011043133001<br>5511  |
| k__Bacteria;p__Actinobacteria;c__Coriobacteriia;o__Coriobacteriales;f__Coriobacteriaceae;g__Atopobium              | 0.0170705259149<br>819 | 0.07302391641<br>40893 | 0.0007864770501<br>8408  | 0.0031893118818<br>9061  |
| k__Bacteria;p__Firmicutes;c__Bacilli;o__Bacillales;f__Paenibacillaceae;g__Paenibacillus                            | 0.0184953149625<br>019 | 0.07768032284<br>2508  | 0.0033823290074<br>6662  | 0.0004438318215<br>22706 |
| k__Bacteria;p__Bacteroidetes;c__Flavobacteriia;o__Flavobacteriales;f__[Weeksellaceae];g__Chryseobacterium          | 0.0195039975247<br>131 | 0.08045398978<br>94417 | 0.0061760336812<br>1491  | 0.0003951355080<br>40151 |
| k__Bacteria;p__Proteobacteria;c__Alphaproteobacteria;o__Rhizobiales;f__Rhizobiaceae;g__                            | 0.0208570245951<br>454 | 0.08306849450<br>82516 | 0.0019361149588<br>7619  | 0                        |
| k__Bacteria;p__Synergistetes;c__Synergistia;o__Synergistales;f__Dethiosulfovibrionaceae;g__Pyramidobacter          | 0.0208570245951<br>454 | 0.08306849450<br>82516 | 0                        | 0.0024469733143<br>9855  |
| k__Bacteria;p__Proteobacteria;c__Deltaproteobacteria;o__Desulfovibrionales;f__Desulfovibrionaceae;g__Desulfovibrio | 0.0219532861781<br>437 | 0.08595269673<br>13761 | 0.0003197866640<br>16445 | 0.0054972555861<br>5802  |

**Table S1B.** Relative abundance of the most significant genera in the samples collected in periodontitis sites and healthy sites as assessed by Mann-Whitney U tests with false-discovery-rate correction.

| Feature                                                                                                                                         | P value                     | FDR corrected P value    |
|-------------------------------------------------------------------------------------------------------------------------------------------------|-----------------------------|--------------------------|
| c6fe05e0eadde34514f9c0114e4e6217k__Bacteria; p__Actinobacteria; c__Actinobacteria; o__Actinomycetales; f__Actinomycetaceae; g__Actinomyces; s__ | 0.00000067439014384661<br>4 | 0.00092327293996751<br>1 |
| bc5ba73185ee3b14bb2d58b32352573dk__Bacteria; p__Firmicutes; c__Clostridia; o__Clostridiales; f__Veillonellaceae; g__Dialister; s__              | 0.00000101570180414468      | 0.00092327293996751<br>1 |

|                                                                                                                                                   |                        |                     |
|---------------------------------------------------------------------------------------------------------------------------------------------------|------------------------|---------------------|
| 551afecd8c6458bbc62c7b8c202333d6k__Bacteria; p__Spirochaetes; c__Spirochaetes; o__Spirochaetales; f__Spirochaetaceae; g__Treponema; s__           | 0.00000400970689334508 | 0.00228806082949444 |
| 73185b4ea26a363e443916df0e80da85k__Bacteria; p__Synergistetes; c__Synergistia; o__Synergistales; f__Dethiosulfovibrionaceae; g__TG5; s__          | 0.00000918614206296093 | 0.00228806082949444 |
| c95baa0e17797184c2babd17b5b602fdk__Bacteria; p__Bacteroidetes; c__Bacteroidia; o__Bacteroidales; f__; g__; s__                                    | 0.00000947382080970403 | 0.00228806082949444 |
| f872dd32faa2d1ce555803411d38bd04k__Bacteria; p__Synergistetes; c__Synergistia; o__Synergistales; f__Dethiosulfovibrionaceae; g__TG5; s__          | 0.0000096820260747471  | 0.00228806082949444 |
| d408960aaa7ed992b378f7b989c83352k__Bacteria; p__Spirochaetes; c__Spirochaetes; o__Spirochaetales; f__Spirochaetaceae; g__Treponema; s__socranskii | 0.0000110861296220094  | 0.00228806082949444 |
| 1b84689077164dbfd545d0166414c410k__Bacteria; p__Firmicutes; c__Bacilli; o__Lactobacillales; f__Enterococcaceae; g__Enterococcus                   | 0.0000129923356289357  | 0.00228806082949444 |
| f37c1e77018a107cdfb67494ad642c71k__Bacteria; p__Spirochaetes; c__Spirochaetes; o__Spirochaetales; f__Spirochaetaceae; g__Treponema; s__           | 0.0000132835669621462  | 0.00228806082949444 |
| 83e17f478f7b8555164930da9d203a1bk__Bacteria; p__Actinobacteria; c__Actinobacteria; o__Actinomycetales; f__Actinomycetaceae; g__Actinomyces; s__   | 0.0000133431793534294  | 0.00228806082949444 |
| 9564ad66d1862a76320e4f0f0611b951k__Bacteria; p__Spirochaetes; c__Spirochaetes; o__Spirochaetales; f__Spirochaetaceae; g__Treponema; s__socranskii | 0.0000138441524336848  | 0.00228806082949444 |
| cfe787fd73e7e99342f3795b93c8094ek__Bacteria; p__Spirochaetes; c__Spirochaetes; o__Spirochaetales; f__Spirochaetaceae; g__Treponema; s__           | 0.0000171038818620973  | 0.00259123810210775 |
| 76c67adc9e35b61b046958ca9265cb52k__Bacteria; p__Firmicutes; c__Clostridia; o__Clostridiales; f__Veillonellaceae; g__Megasphaera; s__              | 0.0000217572629266551  | 0.00304266953851223 |
| e96068176ed806770bce75b445f52bf0k__Bacteria; p__Firmicutes; c__Clostridia; o__Clostridiales; f__Veillonellaceae; g__Dialister; s__                | 0.0000302888796290739  | 0.00384817726949115 |

|                                                                                                                                                                    |                       |                     |
|--------------------------------------------------------------------------------------------------------------------------------------------------------------------|-----------------------|---------------------|
| 144f6dc6ca0a9419a0d4441bd06fded6k__Bacteria; p__Firmicutes; c__Clostridia; o__Clostridiales; f__[Mogibacteriaceae]; g__; s__                                       | 0.0000317506375370557 | 0.00384817726949115 |
| 13799ebd90b035f0f87a6cfb4b5b9785k__Bacteria; p__Spirochaetes; c__Spirochaetes; o__Spirochaetales; f__Spirochaetaceae; g__Treponema; s__                            | 0.0000381319770916692 | 0.0042425011190912  |
| ac8d1d95775840e7164322beaad96fc3k__Bacteria; p__Firmicutes; c__Clostridia; o__Clostridiales; f__Veillonellaceae; g__Schwartzia; s__                                | 0.0000416942741784366 | 0.0042425011190912  |
| 790fe3b27ec763bb3d21d47ab02eca80k__Bacteria; p__Synergistetes; c__Synergistia; o__Synergistales; f__Dethiosulfovibrionaceae; g__TG5; s__                           | 0.0000442632153632012 | 0.0042425011190912  |
| d4787d376913d382877e5f423dc6fcbfk__Bacteria; p__Synergistetes; c__Synergistia; o__Synergistales; f__Dethiosulfovibrionaceae; g__TG5; s__                           | 0.0000443385705515581 | 0.0042425011190912  |
| 4791c48746fd0d53a6252ab17a4bf90fk__Bacteria; p__Bacteroidetes; c__Bacteroidia; o__Bacteroidales; f__; g__; s__                                                     | 0.0000549134353812854 | 0.00499163127615884 |
| 36839726526cc2fd509378431a87de2ek__Bacteria; p__TM7; c__TM7-3; o__I025; f__Rs-045; g__; s__                                                                        | 0.0000615730442498487 | 0.00533046640220119 |
| 2b18cb213d6dc1f56502ae84e29b4587k__Bacteria; p__Bacteroidetes; c__Bacteroidia; o__Bacteroidales; f__; g__; s__                                                     | 0.0000765085487379435 | 0.00632238825479915 |
| 5d23c90c9c9e913dbeeb783b3a965744k__Bacteria; p__Firmicutes; c__Clostridia; o__Clostridiales; f__Veillonellaceae; g__Selenomonas; s__                               | 0.0000911546603150587 | 0.00720518141099029 |
| a9dbae538a72ec4456d0c44a3311c9c7k__Bacteria; p__Firmicutes; c__Clostridia; o__Clostridiales; f__Veillonellaceae; g__Megasphaera; s__                               | 0.000104728900671664  | 0.00758945151231151 |
| 4a2c4912f078689e3a3f86781668c24bk__Bacteria; p__TM7; c__TM7-3; o__I025; f__Rs-045; g__; s__                                                                        | 0.000107244448240939  | 0.00758945151231151 |
| 2a0cc23acd500009cb08f6e1e585cec5k__Bacteria; p__Proteobacteria; c__Deltaproteobacteria; o__Desulfobacterales; f__Desulfobulbaceae; g__Desulfobulbus; s__           | 0.000111161089824584  | 0.00758945151231151 |
| 519cc5eed90752b5ec6f4bf826414be9k__Bacteria; p__TM7; c__TM7-3; o__; f__; g__; s__                                                                                  | 0.000112714626420468  | 0.00758945151231151 |
| 5a1ce3b38295597fa289c6d4a87dc931k__Bacteria; p__Proteobacteria; c__Epsilonproteobacteria; o__Campylobacterales; f__Campylobacteraceae; g__Campylobacter; s__rectus | 0.000120306407578308  | 0.00781132317776301 |

|                                                                                                                                                                     |                      |                     |
|---------------------------------------------------------------------------------------------------------------------------------------------------------------------|----------------------|---------------------|
| 2bbe980ffbf03d99af48e37a96b846d2k__Bacteria; p__Bacteroidetes; c__Bacteroidia; o__Bacteroidales; f__ ; g__ ; s__                                                    | 0.000128731287721336 | 0.00807012003715134 |
| bf52686b796569563cd1101d06a81652k__Bacteria; p__Proteobacteria; c__Epsilonproteobacteria; o__Campylobacteriales; f__Campylobacteraceae; g__Campylobacter; s__rectus | 0.000146463719180786 | 0.00874760141359196 |
| c857267853fcb382f31c347a4cd18779k__Bacteria; p__TM7; c__TM7-3; o__ ; f__ ; g__ ; s__                                                                                | 0.000149161520253768 | 0.00874760141359196 |
| a8ccf8547a9588b16888ed0c2965372dk__Bacteria; p__Firmicutes; c__Bacilli; o__Lactobacillales; f__Enterococcaceae; g__Enterococcus                                     | 0.000181665400033847 | 0.010038407749674   |
| 9aefcdd447c21a7e8db1289570b0525ak__Bacteria; p__Proteobacteria; c__Deltaproteobacteria; o__Desulfobacteriales; f__Desulfobulbaceae; g__Desulfobulbus; s__           | 0.000182499703681771 | 0.010038407749674   |
| f21b8cc7513de3a8858f616d95aa0ef0k__Bacteria; p__Actinobacteria; c__Actinobacteria; o__Actinomycetales; f__Actinomycetaceae; g__Actinomyces; s__                     | 0.000187736998618766 | 0.010038407749674   |
| 69356212695e27fe4c2cf626f17d383ek__Bacteria; p__Firmicutes; c__Clostridia; o__Clostridiales; f__Eubacteriaceae; g__Pseudoramibacter_Eubacterium; s__                | 0.000195668063425801 | 0.0101635582659459  |
| a329e9b559532fe253c6ec195ad9bae9k__Bacteria; p__Firmicutes; c__Clostridia; o__Clostridiales; f__Veillonellaceae; g__Schwartzia; s__                                 | 0.000204925784795082 | 0.0103487521321517  |
| 2b0da9fcb02a4e7e60c5789761a8e43k__Bacteria; p__Actinobacteria; c__Coriobacteriia; o__Coriobacteriales; f__Coriobacteriaceae                                         | 0.000213921317448761 | 0.010511052841131   |
| ecdd86b0cb840f683461c6bc18db6ddak__Bacteria; p__Firmicutes; c__Clostridia; o__Clostridiales; f__Veillonellaceae; g__Schwartzia; s__                                 | 0.000252949905360099 | 0.0118945462630402  |
| bf3651ee44868000213c7da680830495k__Bacteria; p__Firmicutes; c__Clostridia; o__Clostridiales; f__Veillonellaceae; g__Selenomonas; s__                                | 0.000255163533695581 | 0.0118945462630402  |
| d45149d997d8a052551e26cf9a001017k__Bacteria; p__Firmicutes; c__Clostridia; o__Clostridiales; f__Peptostreptococcaceae; g__Filifactor; s__                           | 0.000265889676595768 | 0.0120846858012776  |
| 9ac732c08f0112c91f65d27aad0d79a8k__Bacteria; p__Firmicutes; c__Clostridia; o__Clostridiales; f__Eubacteriaceae; g__Pseudoramibacter_Eubacterium; s__                | 0.000280867388149132 | 0.0124540710159786  |

|                                                                                                                                                |                      |                    |
|------------------------------------------------------------------------------------------------------------------------------------------------|----------------------|--------------------|
| a054733fa78e1f68418eb5c25bba3f3ck__Bacteria; p__Chloroflexi; c__Anaerolineae; o__Anaerolineales; f__Anaerolinaceae; g__SHD-231; s__            | 0.0003016912358484   | 0.0130589206374379 |
| 8e0097c236b4dcfd96c4f15431283011k__Bacteria; p__Chloroflexi; c__Anaerolineae; o__Anaerolineales; f__Anaerolinaceae; g__SHD-231; s__            | 0.000315110505774773 | 0.0133225790581055 |
| a49fd8e92bf0c535490f157c5830220dk__Bacteria; p__Firmicutes; c__Clostridia; o__Clostridiales; f__Peptostreptococcaceae; g__Filifactor; s__      | 0.000342508115434604 | 0.0141518125877298 |
| 5c3bed3239c2712137b24fe8d30f54e3k__Bacteria; p__Fusobacteria; c__Fusobacteriia; o__Fusobacteriales; f__Fusobacteriaceae; g__Fusobacterium; s__ | 0.000360530712824447 | 0.0145023034892892 |
| 8d0a25543b5540681c5fa5a24b788d2ck__Bacteria; p__Firmicutes; c__Clostridia; o__Clostridiales; f__Veillonellaceae; g__Selenomonas; s__           | 0.000367302319523396 | 0.0145023034892892 |
| fe83ceb71e65a2e803c46db3f91c40dbk__Bacteria; p__Fusobacteria; c__Fusobacteriia; o__Fusobacteriales; f__Fusobacteriaceae; g__Fusobacterium; s__ | 0.000374922037401866 | 0.0145023034892892 |
| a79e88579e498b17533d0eb3fbc97097k__Bacteria; p__Actinobacteria; c__Coriobacteriia; o__Coriobacteriales; f__Coriobacteriaceae                   | 0.00044095899500005  | 0.0167013219356269 |
| 0914f9d58849b13a1b0e58a9a5aedb52k__Bacteria; p__Firmicutes; c__Clostridia; o__Clostridiales; f__[Mogibacteriaceae]; g__; s__                   | 0.000546275022207647 | 0.0200832315301099 |
| 3be1ebe170fe290f25d50b19bd38e5a3k__Bacteria; p__Firmicutes; c__Clostridia; o__Clostridiales; f__[Mogibacteriaceae]; g__; s__                   | 0.00055234410148817  | 0.0200832315301099 |
| 605e49a560632564826705835a96340ek__Bacteria; p__Firmicutes; c__Clostridia; o__Clostridiales; f__[Acidaminobacteraceae]; g__; s__               | 0.000573818328586224 | 0.0204549357131325 |
| 1c76fdf12e1bc025eb1fd181502e26f8k__Bacteria; p__Firmicutes; c__Clostridia; o__Clostridiales; f__Ruminococcaceae; g__Ethanolgenens; s__         | 0.000591805641901514 | 0.0206904357110952 |
| 5cccbe2d225183bcf86c8550bf6e5663k__Bacteria; p__Spirochaetes; c__Spirochaetes; o__Spirochaetales; f__Spirochaetaceae; g__Treponema; s__        | 0.000723300540975533 | 0.0248105732734626 |

|                                                                                                                                                           |                      |                    |
|-----------------------------------------------------------------------------------------------------------------------------------------------------------|----------------------|--------------------|
| 817f2e9e3d43576ce1ef9a949941568bk__Bacteria; p__Firmicutes; c__Clostridia; o__Clostridiales; f__Lachnospiraceae; g__Moryella; s__                         | 0.000914380159238831 | 0.0307841320277073 |
| a8272bacf2c2f52cf6d6671945f3b8b1k__Bacteria; p__Firmicutes; c__Clostridia; o__Clostridiales; f__[Mogibacteriaceae]; g__Mogibacterium; s__                 | 0.000959971963750901 | 0.0317314369108934 |
| 3215553ee75c244878f20d87fac2ecc4k__Bacteria; p__Firmicutes; c__Clostridia; o__Clostridiales; f__Veillonellaceae; g__Selenomonas; s__                      | 0.00100993022971941  | 0.0327866635291052 |
| fd1bf824f51935de4165b38b65de449fk__Bacteria; p__Actinobacteria; c__Coriobacteriia; o__Coriobacteriales; f__Coriobacteriaceae; g__Olsenella; s__uli        | 0.00107495521383502  | 0.0342854136623169 |
| c35f25a0fbe693b2756952031d032a19k__Bacteria; p__Bacteroidetes; c__Bacteroidia; o__Bacteroidales; f__Porphyromonadaceae; g__Porphyromonas; s__endodontalis | 0.00114102386582525  | 0.0357651963460398 |
| eb1b52c186280f228ba2ad84174e2375k__Bacteria; p__SR1; c__; o__; f__; g__; s__                                                                              | 0.00117703007848985  | 0.0362684861473651 |
| 7d9a6febbb1e3dbaf757b457b35793c8k__Bacteria; p__Actinobacteria; c__Actinobacteria; o__Actinomycetales; f__Actinomycetaceae; g__Actinomyces; s__           | 0.00129524337337938  | 0.0392458742133951 |
| cea3087aa1309826968d10332c43cac2k__Bacteria; p__Actinobacteria; c__Coriobacteriia; o__Coriobacteriales; f__Coriobacteriaceae; g__Slackia; s__             | 0.00133493631442647  | 0.0397854790102841 |
| adb88e338556ef8f64fc2274be474a2bk__Bacteria; p__Proteobacteria; c__Gammaproteobacteria; o__Aeromonadales; f__Aeromonadaceae; g__Aeromonas                 | 0.00140078505921287  | 0.0410746328653064 |
| f6417b4f09f1d0a99a0f7e3b99b633b6k__Bacteria; p__Firmicutes; c__Clostridia; o__Clostridiales; f__Veillonellaceae; g__Selenomonas; s__                      | 0.00154894107704419  | 0.0444766367766848 |
| 1566fb11e14dfd6eb34380ea013681b8k__Bacteria; p__Bacteroidetes; c__Bacteroidia; o__Bacteroidales; f__[Paraprevotellaceae]; g__[Prevotella]; s__tannerae    | 0.0015657341879581   | 0.0444766367766848 |
| d3ca912e1fa90614ab126ec80ce08bffk__Bacteria; p__Actinobacteria; c__Coriobacteriia; o__Coriobacteriales; f__Coriobacteriaceae; g__Olsenella; s__uli        | 0.00168808453265172  | 0.0472144258517049 |
| 5150194a19241bd02c775d7141db7a3fk__Bacteria; p__Firmicutes; c__Clostridia; o__Clostridiales; f__[Mogibacteriaceae]; g__; s__                              | 0.00177050160418882  | 0.0487692714608374 |

|                                                                                                                                                           |                     |                    |
|-----------------------------------------------------------------------------------------------------------------------------------------------------------|---------------------|--------------------|
| cefd913c459ceb525dea51c11fed8410k__Bacteria; p__Bacteroidetes; c__Bacteroidia; o__Bacteroidales; f__Prevotellaceae; g__Prevotella; s__nigrescens          | 0.00187595297839018 | 0.0504736793925543 |
| 0e186d0679dd22f725dae36e97f1a419k__Bacteria; p__Firmicutes; c__Clostridia; o__Clostridiales; f__[Mogibacteriaceae]; g__; s__                              | 0.0018879043997215  | 0.0504736793925543 |
| 09b40fa2d19acbe34df3ac8ce140197dk__Bacteria; p__Bacteroidetes; c__Bacteroidia; o__Bacteroidales; f__Porphyromonadaceae; g__Porphyromonas; s__endodontalis | 0.00195211154532687 | 0.0514338954986122 |
| cd719f1457b504943146deec30dfa854k__Bacteria; p__Spirochaetes; c__Spirochaetes; o__Spirochaetales; f__Spirochaetaceae; g__Treponema; s__                   | 0.00201376394133013 | 0.052300326361974  |
| daa0a485041ae3854efb3e3504688f04k__Bacteria; p__Bacteroidetes; c__Bacteroidia; o__Bacteroidales                                                           | 0.00212724557153839 | 0.0537309372918934 |
| d4a306d7fca5f9e6600812d9885a8bc5k__Bacteria; p__Firmicutes; c__Clostridia; o__Clostridiales; f__Veillonellaceae; g__Schwartzia; s__                       | 0.00212795791255023 | 0.0537309372918934 |
| 5e0c5fa206b7fd068d72d24ea5d3c1f8k__Bacteria; p__Firmicutes; c__Clostridia; o__Clostridiales; f__Peptostreptococcaceae; g__Peptostreptococcus; s__         | 0.00223194623139672 | 0.0552842652974155 |
| 8aec1d202d5fef48dcec9784f1fdeb61k__Bacteria; p__Firmicutes; c__Clostridia; o__Clostridiales; f__Veillonellaceae; g__Dialister; s__                        | 0.00225029462706752 | 0.0552842652974155 |
| 24b9b343cc35188986de7591182a1e82k__Bacteria; p__Firmicutes; c__Clostridia; o__Clostridiales; f__Lachnospiraceae; g__Moryella; s__                         | 0.00236679140379998 | 0.055828747033421  |
| 9fe5a73817c09ab0936b15f4a9a9e754k__Bacteria; p__Actinobacteria; c__Actinobacteria; o__Actinomycetales; f__Propionibacteriaceae; g__Propionibacterium; s__ | 0.0024027594952735  | 0.055828747033421  |
| caf53c77c1727cd43a2d4425aa7e8149k__Bacteria; p__Bacteroidetes; c__Bacteroidia; o__Bacteroidales; f__Porphyromonadaceae; g__Tannerella; s__                | 0.00242161525786669 | 0.055828747033421  |
| ec6c428af11dff7772e6d9f5e96194dk__Bacteria; p__Firmicutes; c__Clostridia; o__Clostridiales; f__[Mogibacteriaceae]; g__; s__                               | 0.00245965657343451 | 0.055828747033421  |
| dfe38c58277aea481171bfe846e3c561k__Bacteria; p__Fusobacteria; c__Fusobacteriia; o__Fusobacteriales; f__Fusobacteriaceae; g__Fusobacterium; s__            | 0.00247716869537676 | 0.055828747033421  |



|                                                                                                                                                            |                     |                    |
|------------------------------------------------------------------------------------------------------------------------------------------------------------|---------------------|--------------------|
| 03c934fdf5c5364a7cd07168f0f14d23k__Bacteria; p__Firmicutes; c__Clostridia; o__Clostridiales; f__[Mogibacteriaceae]; g__; s__                               | 0.00248155867595045 | 0.055828747033421  |
| 4f488ca2f85e46a8cb5f1ff6dbcf4acbk__Bacteria; p__Fusobacteria; c__Fusobacteriia; o__Fusobacteriales; f__Leptotrichiaceae; g__Leptotrichia; s__              | 0.00248741942228114 | 0.055828747033421  |
| df0fd01e72ffe52482b59a99681dfb89k__Bacteria; p__Bacteroidetes; c__Bacteroidia; o__Bacteroidales; f__Prevotellaceae; g__Prevotella; s__                     | 0.00302033204912169 | 0.0669629715280883 |
| 6d338377a30786cb18feca9a0559ee19k__Bacteria; p__Proteobacteria; c__Gammaproteobacteria; o__Enterobacteriales; f__Enterobacteriaceae                        | 0.00317538228601869 | 0.0695523493491804 |
| 2bed993692d7a0d8d6b66cd44a260b05k__Bacteria; p__Bacteroidetes; c__Bacteroidia; o__Bacteroidales; f__Prevotellaceae; g__Prevotella; s__nigrescens           | 0.00322677132494882 | 0.0698365508185351 |
| e078ee117330ac196ca272bf18b08f8ck__Bacteria; p__Firmicutes; c__Bacilli; o__Lactobacillales                                                                 | 0.00346824508287025 | 0.0741796418900955 |
| 3a804f03bb646fdbf7e0573543523525k__Bacteria; p__Actinobacteria; c__Actinobacteria; o__Actinomycetales; f__Actinomycetaceae; g__Actinomyces; s__            | 0.00396001607733144 | 0.0837128980068438 |
| d4418cb8173f9aa6b7728ef28f2d19a0k__Bacteria; p__Firmicutes; c__Bacilli; o__Lactobacillales                                                                 | 0.00418508846226731 | 0.0874539175218616 |
| 65e7acabb644a37d980ca633c1c26e7dk__Bacteria; p__Firmicutes; c__Clostridia; o__Clostridiales; f__[Mogibacteriaceae]; g__Mogibacterium; s__                  | 0.00450842840851339 | 0.0931400323486062 |
| cf2fa22dcc7fb6803c8159d8a1238e4k__Bacteria; p__Actinobacteria; c__Actinobacteria; o__Actinomycetales; f__Actinomycetaceae; g__Actinomyces; s__hyovaginalis | 0.00474796962279649 | 0.0935128324097611 |
| 70a6351e6aebc07f4687dbd9f6042625k__Bacteria; p__Firmicutes; c__Bacilli; o__Bacillales; f__[Exiguobacteraceae]; g__; s__                                    | 0.00488784208319431 | 0.0935128324097611 |
| 8f966d7ebee98150bcde5873000e1121k__Bacteria; p__Bacteroidetes; c__Bacteroidia; o__Bacteroidales; f__Porphyromonadaceae; g__Tannerella; s__                 | 0.00507718686512873 | 0.0935128324097611 |
| b5d801665b8a57b7ec8e6d692022f21fk__Bacteria; p__Firmicutes; c__Bacilli; o__Lactobacillales; f__Enterococcaceae; g__Enterococcus                            | 0.00513371591998184 | 0.0935128324097611 |

|                                                                                                                                                        |                     |                    |
|--------------------------------------------------------------------------------------------------------------------------------------------------------|---------------------|--------------------|
| 446b8b9418dd980c65b0193e336d7397k__Bacteria; p__Firmicutes; c__Erysipelotrichi; o__Erysipelotrichales; f__Erysipelotrichaceae; g__Sharpea; s__         | 0.00513958909533904 | 0.0935128324097611 |
| 388a7ccbe8686fab8f272eac3b2fc879k__Bacteria; p__Firmicutes; c__Bacilli; o__Lactobacillales; f__Streptococcaceae; g__Lactococcus; s__                   | 0.00513958909533904 | 0.0935128324097611 |
| 430c12c4272206d85e53713539a8acf4k__Bacteria; p__Firmicutes; c__Clostridia; o__Clostridiales; f__Veillonellaceae; g__Selenomonas; s__                   | 0.005142527086965   | 0.0935128324097611 |
| 41225c8338f999f75b73968518653579k__Bacteria; p__Fusobacteria; c__Fusobacteriia; o__Fusobacteriales; f__Leptotrichiaceae; g__Leptotrichia; s__          | 0.005142527086965   | 0.0935128324097611 |
| 1392616d0058071c29c79221e0ecdb90k__Bacteria; p__Bacteroidetes; c__Bacteroidia; o__Bacteroidales; f__Prevotellaceae; g__Prevotella; s__                 | 0.005142527086965   | 0.0935128324097611 |
| 73d339dcc87bbf534c6c9c0592422680k__Bacteria; p__Bacteroidetes; c__Bacteroidia; o__Bacteroidales; f__; g__; s__                                         | 0.005142527086965   | 0.0935128324097611 |
| a6abe48ab079a4d35a15c59017217bd6k__Bacteria; p__Fusobacteria; c__Fusobacteriia; o__Fusobacteriales; f__Leptotrichiaceae; g__Leptotrichia; s__          | 0.005142527086965   | 0.0935128324097611 |
| b59bd58bd9c78ace8f946f119363b459k__Bacteria; p__SR1; c__; o__; f__; g__; s__                                                                           | 0.00514546601452188 | 0.0935128324097611 |
| a68bacb3b6b8130e0258cb628daee22k__Bacteria; p__Bacteroidetes; c__Bacteroidia; o__Bacteroidales; f__Porphyromonadaceae; g__Tannerella; s__              | 0.00519515735609784 | 0.0935128324097611 |
| c3d7a43c6666766f50d4962db19f38e7k__Bacteria; p__Bacteroidetes; c__Bacteroidia; o__Bacteroidales; f__Porphyromonadaceae; g__Paludibacter; s__           | 0.00525406572337695 | 0.0936459949519539 |
| 855a533637bcdd353eb10c47cb021d47k__Bacteria; p__Firmicutes; c__Clostridia; o__Clostridiales; f__[Acidaminobacteraceae]; g__; s__                       | 0.00530968711219886 | 0.0937185550483256 |
| e8c5d0c8c25d7174965a425152d8ec9bk__Bacteria; p__Bacteroidetes; c__Bacteroidia; o__Bacteroidales; f__Prevotellaceae; g__Prevotella; s__                 | 0.00547173019039772 | 0.0951454983462067 |
| a947d19dd35a6557cc57c114c2d88f6dk__Bacteria; p__Bacteroidetes; c__Bacteroidia; o__Bacteroidales; f__[Paraprevotellaceae]; g__[Prevotella]; s__tannerae | 0.00549520204969841 | 0.0951454983462067 |

**Table S1C.** Relative abundance of the most significant ASV in the samples collected in periodontitis sites and healthy sites as assessed by Mann-Whitney U tests with false-discovery-rate correction.

| Feature | P value                  | FDR corrected P value | mean relative abundance healthy sites |
|---------|--------------------------|-----------------------|---------------------------------------|
| K01885  | 0.0000000399649528799859 | 0.000217329225747356  | 0.000634224634696454                  |
| K02493  | 0.0000000497502187039539 | 0.000217329225747356  | 0.000724771164667135                  |
| K09141  | 0.0000000618408116515288 | 0.000217329225747356  | 0.00000988783440930178                |
| K16887  | 0.000000161650784712705  | 0.000221432691509016  | 0.00000837155697961101                |
| K00537  | 0.000000199327343052566  | 0.000221432691509016  | 0.000525176425315405                  |
| K11180  | 0.000000199327343052566  | 0.000221432691509016  | 0.00000538596040734554                |
| K11181  | 0.000000199327343052566  | 0.000221432691509016  | 0.00000536093232750798                |
| K05772  | 0.000000245426793896234  | 0.000221432691509016  | 0.000042399115942591                  |
| K03388  | 0.000000272183543826178  | 0.000221432691509016  | 0.0000513825081518665                 |
| K19116  | 0.000000272183543826178  | 0.000221432691509016  | 0.0000268414419934178                 |
| K04070  | 0.000000370451440882709  | 0.000221432691509016  | 0.0000982727445737541                 |
| K05773  | 0.000000370451440882709  | 0.000221432691509016  | 0.0000309734365091087                 |
| K11782  | 0.000000370451440882709  | 0.000221432691509016  | 0.0000316696425131894                 |
| K01922  | 0.000000410239797767579  | 0.000221432691509016  | 0.000139914230566253                  |
| K05299  | 0.000000454136099359966  | 0.000221432691509016  | 0.0000254651382345501                 |
| K06857  | 0.000000454136099359966  | 0.000221432691509016  | 0.0000290082147274849                 |
| K11785  | 0.000000454136099359966  | 0.000221432691509016  | 0.0000221902762310504                 |
| K05362  | 0.000000502546242123424  | 0.000221432691509016  | 0.000137951425848812                  |
| K11784  | 0.000000502546242123424  | 0.000221432691509016  | 0.0000331599923787385                 |
| K09740  | 0.00000055591428809767   | 0.000221432691509016  | 0.00000798772987881901                |
| K16885  | 0.00000055591428809767   | 0.000221432691509016  | 0.00000649002179551631                |

|        |                         |                      |                        |
|--------|-------------------------|----------------------|------------------------|
| K03686 | 0.000000614725854433303 | 0.000221432691509016 | 0.0008653370528741     |
| K19419 | 0.000000614725854433303 | 0.000221432691509016 | 0.00000688338225919987 |
| K07404 | 0.000000679511784310068 | 0.000221432691509016 | 0.000214231545047507   |
| K08253 | 0.000000679511784310068 | 0.000221432691509016 | 0.00000479068484855994 |
| K00958 | 0.000000829380406221231 | 0.000221432691509016 | 0.0000355150320958098  |
| K01155 | 0.000000829380406221231 | 0.000221432691509016 | 0.000185955825838931   |
| K02236 | 0.000000829380406221231 | 0.000221432691509016 | 0.00016689777433406    |
| K04077 | 0.000000829380406221231 | 0.000221432691509016 | 0.000797226355907243   |
| K06878 | 0.000000829380406221231 | 0.000221432691509016 | 0.000250837750782942   |
| K07714 | 0.000000829380406221231 | 0.000221432691509016 | 0.0000265633925917191  |
| K03739 | 0.000000915788332803924 | 0.000221432691509016 | 0.000160659868611631   |
| K03740 | 0.000000915788332803924 | 0.000221432691509016 | 0.000161027244416888   |
| K18285 | 0.000000915788332803924 | 0.000221432691509016 | 0.0000429322945767112  |
| K02428 | 0.00000101083076871153  | 0.000221432691509016 | 0.000842237230990787   |
| K03465 | 0.00000101083076871153  | 0.000221432691509016 | 0.000120084822140722   |
| K03933 | 0.00000101083076871153  | 0.000221432691509016 | 0.000070902504465135   |
| K07707 | 0.00000101083076871153  | 0.000221432691509016 | 0.000224329528068607   |
| K16886 | 0.00000101083076871153  | 0.000221432691509016 | 0.00000689897428396655 |
| K00687 | 0.000001115331189493    | 0.000221432691509016 | 0.000131178439329202   |
| K16509 | 0.000001115331189493    | 0.000221432691509016 | 0.00037804819251603    |
| K19710 | 0.000001115331189493    | 0.000221432691509016 | 0.0000857734418361348  |
| K00383 | 0.00000123018754345587  | 0.000221432691509016 | 0.000247106088163256   |
| K02440 | 0.00000123018754345587  | 0.000221432691509016 | 0.000460578997131037   |
| K05593 | 0.00000123018754345587  | 0.000221432691509016 | 0.000119687812289722   |
| K07467 | 0.00000123018754345587  | 0.000221432691509016 | 0.000246051773452677   |

|        |                        |                      |                       |
|--------|------------------------|----------------------|-----------------------|
| K12556 | 0.00000123018754345587 | 0.000221432691509016 | 0.000129370769158944  |
| K13929 | 0.00000123018754345587 | 0.000221432691509016 | 0.0000705607513162033 |
| K00105 | 0.00000135637858311105 | 0.000221432691509016 | 0.000123944049011046  |
| K02082 | 0.00000135637858311105 | 0.000221432691509016 | 0.000105441729170464  |
| K03697 | 0.00000135637858311105 | 0.000221432691509016 | 0.000125655168874951  |
| K08982 | 0.00000135637858311105 | 0.000221432691509016 | 0.0000290986054794242 |
| K11706 | 0.00000135637858311105 | 0.000221432691509016 | 0.000173865052712788  |
| K13038 | 0.00000135637858311105 | 0.000221432691509016 | 0.000566034037628397  |
| K13932 | 0.00000135637858311105 | 0.000221432691509016 | 0.000070551422586573  |
| K02008 | 0.00000149497069640244 | 0.000221432691509016 | 0.00012413312264324   |
| K02779 | 0.00000149497069640244 | 0.000221432691509016 | 0.000210151016685277  |
| K03346 | 0.00000149497069640244 | 0.000221432691509016 | 0.000155545241516348  |
| K03367 | 0.00000149497069640244 | 0.000221432691509016 | 0.000167386518347016  |
| K03930 | 0.00000149497069640244 | 0.000221432691509016 | 0.00013070266246237   |
| K06198 | 0.00000149497069640244 | 0.000221432691509016 | 0.0001340217136928    |
| K09116 | 0.00000149497069640244 | 0.000221432691509016 | 0.000011465004234231  |
| K13930 | 0.00000149497069640244 | 0.000221432691509016 | 0.0000688822644991053 |
| K13934 | 0.00000149497069640244 | 0.000221432691509016 | 0.0000703352069383497 |
| K14188 | 0.00000149497069640244 | 0.000221432691509016 | 0.000163766911345833  |
| K19115 | 0.00000149497069640244 | 0.000221432691509016 | 0.000030936585683141  |
| K03095 | 0.00000164712527365909 | 0.000221432691509016 | 0.000121767806338998  |
| K07660 | 0.00000164712527365909 | 0.000221432691509016 | 0.0000418933060031735 |
| K10013 | 0.00000164712527365909 | 0.000221432691509016 | 0.0000179433266251694 |
| K13931 | 0.00000164712527365909 | 0.000221432691509016 | 0.0000702239477037776 |
| K15342 | 0.00000164712527365909 | 0.000221432691509016 | 0.000485859262751768  |

|        |                        |                      |                       |
|--------|------------------------|----------------------|-----------------------|
| K03825 | 0.00000181410664848461 | 0.000221432691509016 | 0.0000341198303740731 |
| K06990 | 0.00000181410664848461 | 0.000221432691509016 | 0.00004681579704887   |
| K11704 | 0.00000181410664848461 | 0.000221432691509016 | 0.000174969588977242  |
| K12525 | 0.00000181410664848461 | 0.000221432691509016 | 0.0000223299820146314 |
| K18237 | 0.00000181410664848461 | 0.000221432691509016 | 0.0000012342130391443 |
| K00762 | 0.00000199729065319521 | 0.000221432691509016 | 0.000710986907146674  |
| K01484 | 0.00000199729065319521 | 0.000221432691509016 | 0.0000507888826998622 |
| K02819 | 0.00000199729065319521 | 0.000221432691509016 | 0.000181366184723605  |
| K03389 | 0.00000199729065319521 | 0.000221432691509016 | 0.0000362234729353292 |
| K03564 | 0.00000199729065319521 | 0.000221432691509016 | 0.000417682317216159  |
| K06286 | 0.00000199729065319521 | 0.000221432691509016 | 0.000141696387831016  |
| K07533 | 0.00000199729065319521 | 0.000221432691509016 | 0.000262179955413911  |
| K13935 | 0.00000199729065319521 | 0.000221432691509016 | 0.0000616178217408233 |
| K15723 | 0.00000199729065319521 | 0.000221432691509016 | 0.0000221212956593237 |
| K19005 | 0.00000199729065319521 | 0.000221432691509016 | 0.000173951700630612  |
| K00395 | 0.00000219817383193646 | 0.000221432691509016 | 0.0000218333752598138 |
| K00486 | 0.00000219817383193646 | 0.000221432691509016 | 0.0000113240452980504 |
| K00800 | 0.00000219817383193646 | 0.000221432691509016 | 0.000712836635130302  |
| K01215 | 0.00000219817383193646 | 0.000221432691509016 | 0.000153412927819654  |
| K03184 | 0.00000219817383193646 | 0.000221432691509016 | 0.0000319562390178917 |
| K03531 | 0.00000219817383193646 | 0.000221432691509016 | 0.000753254546414493  |
| K07136 | 0.00000219817383193646 | 0.000221432691509016 | 0.0000422606081954548 |
| K07146 | 0.00000219817383193646 | 0.000221432691509016 | 0.000272500127677366  |
| K07345 | 0.00000219817383193646 | 0.000221432691509016 | 0.0000526643309434323 |
| K11085 | 0.00000219817383193646 | 0.000221432691509016 | 0.000454525192367247  |

|        |                        |                      |                          |
|--------|------------------------|----------------------|--------------------------|
| K01261 | 0.00000241838335725486 | 0.000221432691509016 | 0.000140204738454209     |
| K01844 | 0.00000241838335725486 | 0.000221432691509016 | 0.0000646222545065438    |
| K02086 | 0.00000241838335725486 | 0.000221432691509016 | 0.000143669586285372     |
| K05910 | 0.00000241838335725486 | 0.000221432691509016 | 0.0000660184919838832    |
| K07070 | 0.00000241838335725486 | 0.000221432691509016 | 0.0000318380543479259    |
| K07706 | 0.00000241838335725486 | 0.000221432691509016 | 0.000203367977421999     |
| K12293 | 0.00000241838335725486 | 0.000221432691509016 | 0.0000456787060642847    |
| K13057 | 0.00000241838335725486 | 0.000221432691509016 | 0.0000338236503877647    |
| K16169 | 0.00000241838335725486 | 0.000221432691509016 | 0.000139598652582366     |
| K16693 | 0.00000241838335725486 | 0.000221432691509016 | 0.00000605614942943825   |
| K18011 | 0.00000241838335725486 | 0.000221432691509016 | 0.0000646927101520438    |
| K10461 | 0.00000265822105024469 | 0.000221432691509016 | 0.0000000619148521904013 |
| K00864 | 0.00000265968769867704 | 0.000221432691509016 | 0.000527740032125822     |
| K01146 | 0.00000265968769867704 | 0.000221432691509016 | 0.0000210663748555657    |
| K02248 | 0.00000265968769867704 | 0.000221432691509016 | 0.0000950209182044395    |
| K02853 | 0.00000265968769867704 | 0.000221432691509016 | 0.00000581160401234306   |
| K03761 | 0.00000265968769867704 | 0.000221432691509016 | 0.0000631019930908956    |
| K05368 | 0.00000265968769867704 | 0.000221432691509016 | 0.0000210667026246272    |
| K06169 | 0.00000265968769867704 | 0.000221432691509016 | 0.0000428975647412542    |
| K06858 | 0.00000265968769867704 | 0.000221432691509016 | 0.0000281048541657316    |
| K08351 | 0.00000265968769867704 | 0.000221432691509016 | 0.0000184561590858417    |
| K12292 | 0.00000265968769867704 | 0.000221432691509016 | 0.0000488083430507733    |
| K12582 | 0.00000265968769867704 | 0.000221432691509016 | 0.00000581008052617097   |
| K12961 | 0.00000265968769867704 | 0.000221432691509016 | 0.0000210664027534748    |
| K17999 | 0.0000029224084863488  | 0.000221432691509016 | 0.000000372880151436163  |

|        |                        |                      |                       |
|--------|------------------------|----------------------|-----------------------|
| K00394 | 0.00000292400809476094 | 0.000221432691509016 | 0.0000224924263697255 |
| K01598 | 0.00000292400809476094 | 0.000221432691509016 | 0.000146102660748014  |
| K02043 | 0.00000292400809476094 | 0.000221432691509016 | 0.0000275542987424163 |
| K02859 | 0.00000292400809476094 | 0.000221432691509016 | 0.0000488559787078402 |
| K03390 | 0.00000292400809476094 | 0.000221432691509016 | 0.0000388969436833685 |
| K03713 | 0.00000292400809476094 | 0.000221432691509016 | 0.000143704207602345  |
| K03807 | 0.00000292400809476094 | 0.000221432691509016 | 0.0000270860008519012 |
| K05827 | 0.00000292400809476094 | 0.000221432691509016 | 0.0000140197716273457 |
| K06168 | 0.00000292400809476094 | 0.000221432691509016 | 0.000574167759307935  |
| K08352 | 0.00000292400809476094 | 0.000221432691509016 | 0.000024028993465286  |
| K08994 | 0.00000292400809476094 | 0.000221432691509016 | 0.000113220757999262  |
| K09976 | 0.00000292400809476094 | 0.000221432691509016 | 0.000147116715544744  |
| K11391 | 0.00000292400809476094 | 0.000221432691509016 | 0.00002085283963972   |
| K11617 | 0.00000292400809476094 | 0.000221432691509016 | 0.000143375308480172  |
| K18692 | 0.00000292400809476094 | 0.000221432691509016 | 0.000146102974227502  |
| K18891 | 0.00000292400809476094 | 0.000221432691509016 | 0.0000949190201370871 |
| K18892 | 0.00000292400809476094 | 0.000221432691509016 | 0.0000948983112071306 |
| K19049 | 0.00000292400809476094 | 0.000221432691509016 | 0.000021853925658448  |
| K00138 | 0.00000321343088313378 | 0.000221432691509016 | 0.0000919247955116601 |
| K00158 | 0.00000321343088313378 | 0.000221432691509016 | 0.000108699817415545  |
| K01892 | 0.00000321343088313378 | 0.000221432691509016 | 0.000749977430425447  |
| K02006 | 0.00000321343088313378 | 0.000221432691509016 | 0.000130217065588193  |
| K02243 | 0.00000321343088313378 | 0.000221432691509016 | 0.000145876168854405  |
| K03472 | 0.00000321343088313378 | 0.000221432691509016 | 0.0000317800142013612 |
| K09916 | 0.00000321343088313378 | 0.000221432691509016 | 0.0000313859008381164 |



|        |                        |                      |                       |
|--------|------------------------|----------------------|-----------------------|
| K12308 | 0.00000321343088313378 | 0.000221432691509016 | 0.000374547261125537  |
| K14982 | 0.00000321343088313378 | 0.000221432691509016 | 0.00011431090516968   |
| K16869 | 0.00000321343088313378 | 0.000221432691509016 | 0.0000808234232535075 |
| K17759 | 0.00000321343088313378 | 0.000221432691509016 | 0.000352466081458749  |
| K18014 | 0.00000321343088313378 | 0.000221432691509016 | 0.0000757838530340061 |
| K18954 | 0.00000321343088313378 | 0.000221432691509016 | 0.0000553322730329956 |
| K19000 | 0.00000321343088313378 | 0.000221432691509016 | 0.0000224867475146454 |
| K00452 | 0.0000035302207462238  | 0.000228338143113114 | 0.0000121020123445711 |
| K01482 | 0.0000035302207462238  | 0.000228338143113114 | 0.0000209455030132888 |
| K02244 | 0.0000035302207462238  | 0.000228338143113114 | 0.000156320856777631  |
| K04485 | 0.0000035302207462238  | 0.000228338143113114 | 0.000750338651229583  |
| K06447 | 0.0000035302207462238  | 0.000228338143113114 | 0.0000708742341944725 |
| K07012 | 0.0000035302207462238  | 0.000228338143113114 | 0.000319549999610333  |
| K11705 | 0.0000035302207462238  | 0.000228338143113114 | 0.000169820370595564  |
| K12555 | 0.0000035302207462238  | 0.000228338143113114 | 0.000143621963506434  |
| K13938 | 0.0000035302207462238  | 0.000228338143113114 | 0.0000307461039037346 |
| K14983 | 0.0000035302207462238  | 0.000228338143113114 | 0.000134216478985991  |
| K00839 | 0.00000387683493373189 | 0.000230104409659428 | 0.0000349136931858627 |
| K01678 | 0.00000387683493373189 | 0.000230104409659428 | 0.000119552688881619  |
| K01825 | 0.00000387683493373189 | 0.000230104409659428 | 0.0000313711025563649 |
| K01883 | 0.00000387683493373189 | 0.000230104409659428 | 0.000739925987241459  |
| K02245 | 0.00000387683493373189 | 0.000230104409659428 | 0.000139760919804379  |
| K02362 | 0.00000387683493373189 | 0.000230104409659428 | 0.0000297775104890175 |
| K02761 | 0.00000387683493373189 | 0.000230104409659428 | 0.000799576012789424  |
| K03525 | 0.00000387683493373189 | 0.000230104409659428 | 0.000353255625987404  |

|        |                        |                      |                        |
|--------|------------------------|----------------------|------------------------|
| K07225 | 0.00000387683493373189 | 0.000230104409659428 | 0.0000253165377280844  |
| K07570 | 0.00000387683493373189 | 0.000230104409659428 | 0.000147598433040097   |
| K07637 | 0.00000387683493373189 | 0.000230104409659428 | 0.0000409814089119894  |
| K09984 | 0.00000387683493373189 | 0.000230104409659428 | 0.0000334466329326113  |
| K11473 | 0.00000387683493373189 | 0.000230104409659428 | 0.0000704515735593315  |
| K00563 | 0.0000042559385263766  | 0.000230104409659428 | 0.000195169200086045   |
| K01590 | 0.0000042559385263766  | 0.000230104409659428 | 0.0000118251037873293  |
| K01868 | 0.0000042559385263766  | 0.000230104409659428 | 0.000740108742467166   |
| K02240 | 0.0000042559385263766  | 0.000230104409659428 | 0.000147126805436559   |
| K03664 | 0.0000042559385263766  | 0.000230104409659428 | 0.000726770495075672   |
| K03693 | 0.0000042559385263766  | 0.000230104409659428 | 0.000143848403086787   |
| K05340 | 0.0000042559385263766  | 0.000230104409659428 | 0.000154956380461052   |
| K05812 | 0.0000042559385263766  | 0.000230104409659428 | 0.0000359156963784232  |
| K06222 | 0.0000042559385263766  | 0.000230104409659428 | 0.0000389152432912445  |
| K07284 | 0.0000042559385263766  | 0.000230104409659428 | 0.000787193089330358   |
| K07577 | 0.0000042559385263766  | 0.000230104409659428 | 0.0000539912766740487  |
| K07740 | 0.0000042559385263766  | 0.000230104409659428 | 0.0000302507571245606  |
| K09945 | 0.0000042559385263766  | 0.000230104409659428 | 0.0000193831625631935  |
| K11144 | 0.0000042559385263766  | 0.000230104409659428 | 0.00015289548992259    |
| K14287 | 0.0000042559385263766  | 0.000230104409659428 | 0.000061544371058561   |
| K17737 | 0.0000042559385263766  | 0.000230104409659428 | 0.0000147261729241386  |
| K18888 | 0.0000042559385263766  | 0.000230104409659428 | 0.000090988227547257   |
| K19050 | 0.0000042559385263766  | 0.000230104409659428 | 0.0000095925114380838  |
| K19135 | 0.0000042559385263766  | 0.000230104409659428 | 0.00000210421542710367 |
| K03278 | 0.00000467042080908701 | 0.00024137375779512  | 0.00000133080184589096 |

|        |                        |                      |                       |
|--------|------------------------|----------------------|-----------------------|
| K05526 | 0.00000467042080908701 | 0.00024137375779512  | 0.0000345323114594561 |
| K05979 | 0.00000467042080908701 | 0.00024137375779512  | 0.0000846532356428955 |
| K07777 | 0.00000467042080908701 | 0.00024137375779512  | 0.000030090793891745  |
| K08317 | 0.00000467042080908701 | 0.00024137375779512  | 0.0000791871233568476 |
| K09024 | 0.00000467042080908701 | 0.00024137375779512  | 0.0000386054854378461 |
| K09458 | 0.00000467042080908701 | 0.00024137375779512  | 0.000874742083693158  |
| K09918 | 0.00000467042080908701 | 0.00024137375779512  | 0.0000300340568515956 |
| K18887 | 0.00000467042080908701 | 0.00024137375779512  | 0.0000910361856641152 |
| K03566 | 0.00000512341282561339 | 0.000254793119907745 | 0.00023786938508113   |
| K05836 | 0.00000512341282561339 | 0.000254793119907745 | 0.0000911633268122536 |
| K07251 | 0.00000512341282561339 | 0.000254793119907745 | 0.0000180143391291408 |
| K09778 | 0.00000512341282561339 | 0.000254793119907745 | 0.0000536414495927658 |
| K09959 | 0.00000512341282561339 | 0.000254793119907745 | 0.0000485352173610371 |
| K18012 | 0.00000512341282561339 | 0.000254793119907745 | 0.0000698947395589224 |
| K18013 | 0.00000512341282561339 | 0.000254793119907745 | 0.0000648812845512964 |
| K19114 | 0.00000512341282561339 | 0.000254793119907745 | 0.0000206165416847346 |
| K00793 | 0.00000561830619048016 | 0.0002586628915556   | 0.000544024528336537  |
| K00842 | 0.00000561830619048016 | 0.0002586628915556   | 0.000033485549471243  |
| K00867 | 0.00000561830619048016 | 0.0002586628915556   | 0.000297622963503846  |
| K00892 | 0.00000561830619048016 | 0.0002586628915556   | 0.0000215710158805016 |
| K02007 | 0.00000561830619048016 | 0.0002586628915556   | 0.000131508072620668  |
| K02509 | 0.00000561830619048016 | 0.0002586628915556   | 0.0000441812444912146 |
| K03046 | 0.00000561830619048016 | 0.0002586628915556   | 0.000748284310219433  |
| K04064 | 0.00000561830619048016 | 0.0002586628915556   | 0.0000132309909810626 |
| K05826 | 0.00000561830619048016 | 0.0002586628915556   | 0.0000123348327892269 |

|        |                        |                      |                         |
|--------|------------------------|----------------------|-------------------------|
| K05828 | 0.00000561830619048016 | 0.0002586628915556   | 0.0000123664721942235   |
| K05829 | 0.00000561830619048016 | 0.0002586628915556   | 0.0000123210061616346   |
| K07075 | 0.00000561830619048016 | 0.0002586628915556   | 0.000236625385341313    |
| K07497 | 0.00000561830619048016 | 0.0002586628915556   | 0.000865151746566149    |
| K07652 | 0.00000561830619048016 | 0.0002586628915556   | 0.000155403393768606    |
| K11358 | 0.00000561830619048016 | 0.0002586628915556   | 0.0000831927961125175   |
| K15536 | 0.00000561830619048016 | 0.0002586628915556   | 0.0000216591858331036   |
| K15726 | 0.00000561830619048016 | 0.0002586628915556   | 0.000272120079471343    |
| K00566 | 0.00000615877323832001 | 0.000265028352047379 | 0.000805202678464795    |
| K00794 | 0.00000615877323832001 | 0.000265028352047379 | 0.000550621694380596    |
| K01159 | 0.00000615877323832001 | 0.000265028352047379 | 0.000565675691146629    |
| K01715 | 0.00000615877323832001 | 0.000265028352047379 | 0.000162265385963479    |
| K03119 | 0.00000615877323832001 | 0.000265028352047379 | 0.0001072157053571      |
| K03738 | 0.00000615877323832001 | 0.000265028352047379 | 0.000087007237700443    |
| K04952 | 0.00000615877323832001 | 0.000265028352047379 | 0.000000547801071839679 |
| K07082 | 0.00000615877323832001 | 0.000265028352047379 | 0.000722951068502611    |
| K07498 | 0.00000615877323832001 | 0.000265028352047379 | 0.000514791335323759    |
| K07709 | 0.00000615877323832001 | 0.000265028352047379 | 0.0000179377953769682   |
| K08995 | 0.00000615877323832001 | 0.000265028352047379 | 0.0000529002997967185   |
| K11208 | 0.00000615877323832001 | 0.000265028352047379 | 0.0000106769954158175   |
| K11741 | 0.00000615877323832001 | 0.000265028352047379 | 0.000189808905035565    |
| K12983 | 0.00000615877323832001 | 0.000265028352047379 | 0.00000584331108482591  |
| K13626 | 0.00000615877323832001 | 0.000265028352047379 | 0.000101117334590232    |
| K18824 | 0.00000615877323832001 | 0.000265028352047379 | 0.00000442411567964187  |
| K01118 | 0.00000674878859490549 | 0.000279029326102308 | 0.000300820151128754    |

|        |                        |                      |                        |
|--------|------------------------|----------------------|------------------------|
| K02356 | 0.00000674878859490549 | 0.000279029326102308 | 0.000753620536916892   |
| K03381 | 0.00000674878859490549 | 0.000279029326102308 | 0.0000716796241881149  |
| K03470 | 0.00000674878859490549 | 0.000279029326102308 | 0.000735955927621513   |
| K03488 | 0.00000674878859490549 | 0.000279029326102308 | 0.000439989769848326   |
| K09143 | 0.00000674878859490549 | 0.000279029326102308 | 0.0000102397004713271  |
| K10040 | 0.00000674878859490549 | 0.000279029326102308 | 0.000281918976343094   |
| K14127 | 0.00000674878859490549 | 0.000279029326102308 | 0.00000971767413503127 |
| K16850 | 0.00000674878859490549 | 0.000279029326102308 | 0.0000217669755046713  |
| K19776 | 0.00000674878859490549 | 0.000279029326102308 | 0.00000688905021521602 |
| K00117 | 0.00000739265225863569 | 0.000287604179936517 | 0.0000710305520430623  |
| K00673 | 0.00000739265225863569 | 0.000287604179936517 | 0.0000871629007011518  |
| K01338 | 0.00000739265225863569 | 0.000287604179936517 | 0.000656068073552144   |
| K01923 | 0.00000739265225863569 | 0.000287604179936517 | 0.000741141114062021   |
| K02996 | 0.00000739265225863569 | 0.000287604179936517 | 0.000731852264182725   |
| K03330 | 0.00000739265225863569 | 0.000287604179936517 | 0.00000292340283777933 |
| K03812 | 0.00000739265225863569 | 0.000287604179936517 | 0.0000236896417405213  |
| K04080 | 0.00000739265225863569 | 0.000287604179936517 | 0.00008400772992976    |
| K06183 | 0.00000739265225863569 | 0.000287604179936517 | 0.000515588804212296   |
| K06445 | 0.00000739265225863569 | 0.000287604179936517 | 0.0000477843873381176  |
| K07277 | 0.00000739265225863569 | 0.000287604179936517 | 0.000464461828981235   |
| K07483 | 0.00000739265225863569 | 0.000287604179936517 | 0.00117728829491248    |
| K10039 | 0.00000739265225863569 | 0.000287604179936517 | 0.00014106461271107    |
| K11935 | 0.00000739265225863569 | 0.000287604179936517 | 0.0000149432792662228  |
| K13479 | 0.00000739265225863569 | 0.000287604179936517 | 0.0000391624952788118  |
| K16704 | 0.00000739265225863569 | 0.000287604179936517 | 0.00000642752987733899 |

|        |                        |                      |                        |
|--------|------------------------|----------------------|------------------------|
| K00564 | 0.00000809501428584255 | 0.00030372147905921  | 0.000278950296074834   |
| K00887 | 0.00000809501428584255 | 0.00030372147905921  | 0.000181770280046699   |
| K01826 | 0.00000809501428584255 | 0.00030372147905921  | 0.0000407231502447601  |
| K03086 | 0.00000809501428584255 | 0.00030372147905921  | 0.000952123092120031   |
| K05549 | 0.00000809501428584255 | 0.00030372147905921  | 0.0000293245848464961  |
| K06981 | 0.00000809501428584255 | 0.00030372147905921  | 0.00000173385359305205 |
| K08993 | 0.00000809501428584255 | 0.00030372147905921  | 0.0000230399952196327  |
| K09482 | 0.00000809501428584255 | 0.00030372147905921  | 0.00000290692360118262 |
| K10014 | 0.00000809501428584255 | 0.00030372147905921  | 0.0000279139259242503  |
| K11535 | 0.00000809501428584255 | 0.00030372147905921  | 0.0000598846400703464  |
| K02281 | 0.00000886090117805434 | 0.000312443080669655 | 0.00002764785522113    |
| K02798 | 0.00000886090117805434 | 0.000312443080669655 | 0.000175208877933834   |
| K02906 | 0.00000886090117805434 | 0.000312443080669655 | 0.000719067348104738   |
| K03826 | 0.00000886090117805434 | 0.000312443080669655 | 0.000135996064628144   |
| K07080 | 0.00000886090117805434 | 0.000312443080669655 | 0.000229547745296157   |
| K07348 | 0.00000886090117805434 | 0.000312443080669655 | 0.00000712847177618927 |
| K07702 | 0.00000886090117805434 | 0.000312443080669655 | 0.0000117034671624246  |
| K07713 | 0.00000886090117805434 | 0.000312443080669655 | 0.0000729203691661377  |
| K07803 | 0.00000886090117805434 | 0.000312443080669655 | 0.0000161799759901081  |
| K09122 | 0.00000886090117805434 | 0.000312443080669655 | 0.0000107597583998055  |
| K10041 | 0.00000886090117805434 | 0.000312443080669655 | 0.000139977091514839   |
| K11618 | 0.00000886090117805434 | 0.000312443080669655 | 0.000150427346177727   |
| K12952 | 0.00000886090117805434 | 0.000312443080669655 | 0.00030561044205032    |
| K13638 | 0.00000886090117805434 | 0.000312443080669655 | 0.0000265925327391067  |
| K14056 | 0.00000886090117805434 | 0.000312443080669655 | 0.0000133375782906298  |

|        |                        |                      |                        |
|--------|------------------------|----------------------|------------------------|
| K16511 | 0.00000886090117805434 | 0.000312443080669655 | 0.000163716321489529   |
| K18581 | 0.00000886090117805434 | 0.000312443080669655 | 0.000159666811482601   |
| K18765 | 0.00000886090117805434 | 0.000312443080669655 | 0.0000188476627054137  |
| K01223 | 0.00000969574407429318 | 0.000326588593531224 | 0.00100954108253861    |
| K01631 | 0.00000969574407429318 | 0.000326588593531224 | 0.0000475388884566752  |
| K01729 | 0.00000969574407429318 | 0.000326588593531224 | 0.0000184143999556845  |
| K01756 | 0.00000969574407429318 | 0.000326588593531224 | 0.00075345791749239    |
| K02469 | 0.00000969574407429318 | 0.000326588593531224 | 0.000817990006787293   |
| K03543 | 0.00000969574407429318 | 0.000326588593531224 | 0.000290909529772215   |
| K06928 | 0.00000969574407429318 | 0.000326588593531224 | 0.00000946213946487025 |
| K07013 | 0.00000969574407429318 | 0.000326588593531224 | 0.0000123491943233929  |
| K07464 | 0.00000969574407429318 | 0.000326588593531224 | 0.000231378166999526   |
| K09018 | 0.00000969574407429318 | 0.000326588593531224 | 0.0000295013678104104  |
| K13633 | 0.00000969574407429318 | 0.000326588593531224 | 0.0000118985456843768  |
| K14260 | 0.00000969574407429318 | 0.000326588593531224 | 0.000242077137098231   |
| K16079 | 0.00000969574407429318 | 0.000326588593531224 | 0.0000664416301506332  |
| K16849 | 0.00000969574407429318 | 0.000326588593531224 | 0.0000196014185990979  |
| K00150 | 0.0000106054088565888  | 0.000331788799925862 | 0.0000217162476456483  |
| K01730 | 0.0000106054088565888  | 0.000331788799925862 | 0.0000149626204911278  |
| K01929 | 0.0000106054088565888  | 0.000331788799925862 | 0.000738261283936431   |
| K02066 | 0.0000106054088565888  | 0.000331788799925862 | 0.000438238177227368   |
| K02167 | 0.0000106054088565888  | 0.000331788799925862 | 0.0000263718529299944  |
| K02340 | 0.0000106054088565888  | 0.000331788799925862 | 0.000715836249567066   |
| K02345 | 0.0000106054088565888  | 0.000331788799925862 | 0.0000169214573671261  |
| K02933 | 0.0000106054088565888  | 0.000331788799925862 | 0.000719656792412375   |

|        |                       |                      |                           |
|--------|-----------------------|----------------------|---------------------------|
| K03489 | 0.0000106054088565888 | 0.000331788799925862 | 0.0000111775407914602     |
| K03863 | 0.0000106054088565888 | 0.000331788799925862 | 0.000069098014409675      |
| K05830 | 0.0000106054088565888 | 0.000331788799925862 | 0.0000111645857108933     |
| K05831 | 0.0000106054088565888 | 0.000331788799925862 | 0.0000112614186895884     |
| K06191 | 0.0000106054088565888 | 0.000331788799925862 | 0.000217418371114052      |
| K07104 | 0.0000106054088565888 | 0.000331788799925862 | 0.000176885083654664      |
| K07639 | 0.0000106054088565888 | 0.000331788799925862 | 0.0000281783492488851     |
| K07823 | 0.0000106054088565888 | 0.000331788799925862 | 0.000015935795742911      |
| K08219 | 0.0000106054088565888 | 0.000331788799925862 | 0.00000634089504204356    |
| K09958 | 0.0000106054088565888 | 0.000331788799925862 | 0.0000521820277122363     |
| K13069 | 0.0000106054088565888 | 0.000331788799925862 | 0.0000297022070892575     |
| K13819 | 0.0000106054088565888 | 0.000331788799925862 | 0.0000341554188689528     |
| K13933 | 0.0000106054088565888 | 0.000331788799925862 | 0.0000336814679026749     |
| K14128 | 0.0000106054088565888 | 0.000331788799925862 | 0.0000100475017318177     |
| K19267 | 0.0000106054088565888 | 0.000331788799925862 | 0.000197020939364253      |
| K19788 | 0.0000106054088565888 | 0.000331788799925862 | 0.00000000141073816169145 |
| K00441 | 0.0000115962282821611 | 0.000344391647264295 | 0.000012017021573745      |
| K01244 | 0.0000115962282821611 | 0.000344391647264295 | 0.000000861537350084845   |
| K01467 | 0.0000115962282821611 | 0.000344391647264295 | 0.000110831028637443      |
| K01783 | 0.0000115962282821611 | 0.000344391647264295 | 0.000774608915890132      |
| K02226 | 0.0000115962282821611 | 0.000344391647264295 | 0.000398869978836124      |
| K02234 | 0.0000115962282821611 | 0.000344391647264295 | 0.0000453836994079536     |
| K02470 | 0.0000115962282821611 | 0.000344391647264295 | 0.000824168098984171      |
| K03491 | 0.0000115962282821611 | 0.000344391647264295 | 0.000273570626937153      |
| K05515 | 0.0000115962282821611 | 0.000344391647264295 | 0.00055562371977983       |



|        |                       |                      |                        |
|--------|-----------------------|----------------------|------------------------|
| K05550 | 0.0000115962282821611 | 0.000344391647264295 | 0.0000292785600193415  |
| K06320 | 0.0000115962282821611 | 0.000344391647264295 | 0.0000324471978265274  |
| K07303 | 0.0000115962282821611 | 0.000344391647264295 | 0.0000991707986035795  |
| K07336 | 0.0000115962282821611 | 0.000344391647264295 | 0.0000497952601201465  |
| K07469 | 0.0000115962282821611 | 0.000344391647264295 | 0.0000213089101043945  |
| K07576 | 0.0000115962282821611 | 0.000344391647264295 | 0.000141449890845972   |
| K09797 | 0.0000115962282821611 | 0.000344391647264295 | 0.000111452977697599   |
| K09880 | 0.0000115962282821611 | 0.000344391647264295 | 0.0000213881067886734  |
| K13016 | 0.0000115962282821611 | 0.000344391647264295 | 0.0000353772788853416  |
| K00952 | 0.0000126689588526414 | 0.000363132900275518 | 0.00000153827610320855 |
| K02233 | 0.0000126750362611582 | 0.000363132900275518 | 0.000354818599523611   |
| K02297 | 0.0000126750362611582 | 0.000363132900275518 | 0.0000796108064866804  |
| K02298 | 0.0000126750362611582 | 0.000363132900275518 | 0.0000795113059954364  |
| K02931 | 0.0000126750362611582 | 0.000363132900275518 | 0.00072000788834864    |
| K03328 | 0.0000126750362611582 | 0.000363132900275518 | 0.000264130825705993   |
| K05359 | 0.0000126750362611582 | 0.000363132900275518 | 0.00000107021985813402 |
| K09912 | 0.0000126750362611582 | 0.000363132900275518 | 0.0000314403481074507  |
| K09948 | 0.0000126750362611582 | 0.000363132900275518 | 0.0000375527799885784  |
| K10017 | 0.0000126750362611582 | 0.000363132900275518 | 0.0000244136585180085  |
| K10775 | 0.0000126750362611582 | 0.000363132900275518 | 0.00000372750679556838 |
| K11209 | 0.0000126750362611582 | 0.000363132900275518 | 0.000160860995637521   |
| K18149 | 0.0000126750362611582 | 0.000363132900275518 | 0.0000847947285074745  |
| K00932 | 0.0000138492044044299 | 0.000379252368924427 | 0.00000889499234709152 |
| K01007 | 0.0000138492044044299 | 0.000379252368924427 | 0.000251464165385389   |
| K01071 | 0.0000138492044044299 | 0.000379252368924427 | 0.000153444919621026   |

|        |                       |                      |                        |
|--------|-----------------------|----------------------|------------------------|
| K01807 | 0.0000138492044044299 | 0.000379252368924427 | 0.000353993438504064   |
| K01838 | 0.0000138492044044299 | 0.000379252368924427 | 0.000224056267898532   |
| K02224 | 0.0000138492044044299 | 0.000379252368924427 | 0.000308172205312487   |
| K02994 | 0.0000138492044044299 | 0.000379252368924427 | 0.000720527000171368   |
| K03112 | 0.0000138492044044299 | 0.000379252368924427 | 0.0000262923041804544  |
| K03919 | 0.0000138492044044299 | 0.000379252368924427 | 0.000033225962554988   |
| K06603 | 0.0000138492044044299 | 0.000379252368924427 | 0.0000858648792964261  |
| K07092 | 0.0000138492044044299 | 0.000379252368924427 | 0.00000329072965352635 |
| K07350 | 0.0000138492044044299 | 0.000379252368924427 | 0.00000855467864925211 |
| K09129 | 0.0000138492044044299 | 0.000379252368924427 | 0.0000236281979023169  |
| K09920 | 0.0000138492044044299 | 0.000379252368924427 | 0.0000399774393033405  |
| K11735 | 0.0000138492044044299 | 0.000379252368924427 | 0.0000534345626715744  |
| K13583 | 0.0000138492044044299 | 0.000379252368924427 | 0.0000364707920856086  |
| K18231 | 0.0000138492044044299 | 0.000379252368924427 | 0.0000543484971327194  |
| K00123 | 0.0000151266809715721 | 0.000388030650810912 | 0.000387653898657604   |
| K00840 | 0.0000151266809715721 | 0.000388030650810912 | 0.0000120184145330233  |
| K01575 | 0.0000151266809715721 | 0.000388030650810912 | 0.000184374588637368   |
| K01912 | 0.0000151266809715721 | 0.000388030650810912 | 0.000252653586557174   |
| K02617 | 0.0000151266809715721 | 0.000388030650810912 | 0.0000123978396779613  |
| K02623 | 0.0000151266809715721 | 0.000388030650810912 | 0.0000200428122948719  |
| K03519 | 0.0000151266809715721 | 0.000388030650810912 | 0.0000720693697350265  |
| K03569 | 0.0000151266809715721 | 0.000388030650810912 | 0.000681405966663967   |
| K04069 | 0.0000151266809715721 | 0.000388030650810912 | 0.00081655485521012    |
| K04078 | 0.0000151266809715721 | 0.000388030650810912 | 0.000748691276548971   |
| K06208 | 0.0000151266809715721 | 0.000388030650810912 | 0.0000664820131041233  |

|        |                       |                      |                        |
|--------|-----------------------|----------------------|------------------------|
| K07156 | 0.0000151266809715721 | 0.000388030650810912 | 0.0000845262770334356  |
| K08170 | 0.0000151266809715721 | 0.000388030650810912 | 0.0000103562447262294  |
| K08348 | 0.0000151266809715721 | 0.000388030650810912 | 0.0000152112131136482  |
| K08484 | 0.0000151266809715721 | 0.000388030650810912 | 0.0000578057696616347  |
| K10015 | 0.0000151266809715721 | 0.000388030650810912 | 0.0000261151480747806  |
| K11178 | 0.0000151266809715721 | 0.000388030650810912 | 0.0000675693094660973  |
| K12972 | 0.0000151266809715721 | 0.000388030650810912 | 0.0000805969894398574  |
| K12973 | 0.0000151266809715721 | 0.000388030650810912 | 0.0000138690983744098  |
| K13255 | 0.0000151266809715721 | 0.000388030650810912 | 0.0000156903463683582  |
| K14052 | 0.0000151266809715721 | 0.000388030650810912 | 0.0000053224457134097  |
| K15727 | 0.0000151266809715721 | 0.000388030650810912 | 0.000203808962515939   |
| K17754 | 0.0000151266809715721 | 0.000388030650810912 | 0.00000255918166992185 |
| K18456 | 0.0000151266809715721 | 0.000388030650810912 | 0.0000108859302545805  |
| K19165 | 0.0000151266809715721 | 0.000388030650810912 | 0.000016230144846067   |
| K19775 | 0.0000151266809715721 | 0.000388030650810912 | 0.00000680304357120389 |
| K02499 | 0.00001651603235538   | 0.000407795150170425 | 0.00016150781774891    |
| K04061 | 0.00001651603235538   | 0.000407795150170425 | 0.000117309490298274   |
| K05790 | 0.00001651603235538   | 0.000407795150170425 | 0.00000583258338506558 |
| K07110 | 0.00001651603235538   | 0.000407795150170425 | 0.0000764806906863028  |
| K07460 | 0.00001651603235538   | 0.000407795150170425 | 0.000582210624095478   |
| K13483 | 0.00001651603235538   | 0.000407795150170425 | 0.0000608236598444248  |
| K14057 | 0.00001651603235538   | 0.000407795150170425 | 0.00000440070555995493 |
| K14126 | 0.00001651603235538   | 0.000407795150170425 | 0.00000937125115721473 |
| K15011 | 0.00001651603235538   | 0.000407795150170425 | 0.0000640598319333635  |
| K15012 | 0.00001651603235538   | 0.000407795150170425 | 0.0000693286230028852  |

|        |                       |                      |                         |
|--------|-----------------------|----------------------|-------------------------|
| K15540 | 0.00001651603235538   | 0.000407795150170425 | 0.0000199718231482291   |
| K16149 | 0.00001651603235538   | 0.000407795150170425 | 0.0000443203180289876   |
| K17870 | 0.00001651603235538   | 0.000407795150170425 | 0.00000875453021234548  |
| K17992 | 0.00001651603235538   | 0.000407795150170425 | 0.0000371355497339552   |
| K18335 | 0.00001651603235538   | 0.000407795150170425 | 0.0000334272133410127   |
| K18551 | 0.00001651603235538   | 0.000407795150170425 | 0.000000856733009043173 |
| K00177 | 0.0000180264872449071 | 0.000420471803148352 | 0.00026172417951662     |
| K00442 | 0.0000180264872449071 | 0.000420471803148352 | 0.00000335879534561359  |
| K00691 | 0.0000180264872449071 | 0.000420471803148352 | 0.000152636824356979    |
| K00927 | 0.0000180264872449071 | 0.000420471803148352 | 0.000738797166490075    |
| K01453 | 0.0000180264872449071 | 0.000420471803148352 | 0.0000350370477514483   |
| K02246 | 0.0000180264872449071 | 0.000420471803148352 | 0.000108062104888173    |
| K02863 | 0.0000180264872449071 | 0.000420471803148352 | 0.000710247144803156    |
| K03518 | 0.0000180264872449071 | 0.000420471803148352 | 0.0002223819881757      |
| K05358 | 0.0000180264872449071 | 0.000420471803148352 | 0.0000233823610641466   |
| K05804 | 0.0000180264872449071 | 0.000420471803148352 | 0.0000135155516136618   |
| K05835 | 0.0000180264872449071 | 0.000420471803148352 | 0.00000658892179607379  |
| K06898 | 0.0000180264872449071 | 0.000420471803148352 | 0.000127998190379845    |
| K07391 | 0.0000180264872449071 | 0.000420471803148352 | 0.000614311273511779    |
| K07689 | 0.0000180264872449071 | 0.000420471803148352 | 0.0000254222182504167   |
| K08350 | 0.0000180264872449071 | 0.000420471803148352 | 0.00000687773337385296  |
| K09457 | 0.0000180264872449071 | 0.000420471803148352 | 0.000290092355019761    |
| K09965 | 0.0000180264872449071 | 0.000420471803148352 | 0.0000277184696210493   |
| K10530 | 0.0000180264872449071 | 0.000420471803148352 | 0.0000539939061731264   |
| K11752 | 0.0000180264872449071 | 0.000420471803148352 | 0.000544794216096077    |

|        |                       |                      |                          |
|--------|-----------------------|----------------------|--------------------------|
| K13979 | 0.0000180264872449071 | 0.000420471803148352 | 0.000121774676275249     |
| K13993 | 0.0000180264872449071 | 0.000420471803148352 | 0.000394834968556199     |
| K16845 | 0.0000180264872449071 | 0.000420471803148352 | 0.00000409868694610295   |
| K17329 | 0.0000180264872449071 | 0.000420471803148352 | 0.0000136486982179722    |
| K18007 | 0.0000180264872449071 | 0.000420471803148352 | 0.0000153670278209028    |
| K18023 | 0.0000180264872449071 | 0.000420471803148352 | 0.00000924223962943736   |
| K13048 | 0.0000196589501226216 | 0.000435629309366497 | 0.000000117008755371978  |
| K16956 | 0.0000196589501226216 | 0.000435629309366497 | 0.0000000737745477249731 |
| K00176 | 0.0000196679836155224 | 0.000435629309366497 | 0.000223608416557795     |
| K01775 | 0.0000196679836155224 | 0.000435629309366497 | 0.000837065443941745     |
| K02300 | 0.0000196679836155224 | 0.000435629309366497 | 0.0000780026098263392    |
| K02956 | 0.0000196679836155224 | 0.000435629309366497 | 0.000710133899974932     |
| K02982 | 0.0000196679836155224 | 0.000435629309366497 | 0.000720126337775033     |
| K04720 | 0.0000196679836155224 | 0.000435629309366497 | 0.000277599364037432     |
| K05587 | 0.0000196679836155224 | 0.000435629309366497 | 0.00000396115886357909   |
| K06876 | 0.0000196679836155224 | 0.000435629309366497 | 0.000064363357227882     |
| K07458 | 0.0000196679836155224 | 0.000435629309366497 | 0.000128867375263827     |
| K07644 | 0.0000196679836155224 | 0.000435629309366497 | 0.0000795185414890839    |
| K07739 | 0.0000196679836155224 | 0.000435629309366497 | 0.00000842862897279458   |
| K10748 | 0.0000196679836155224 | 0.000435629309366497 | 0.0000162411940344081    |
| K11041 | 0.0000196679836155224 | 0.000435629309366497 | 0.000100454446813508     |
| K11811 | 0.0000196679836155224 | 0.000435629309366497 | 0.0000311217429191637    |
| K13060 | 0.0000196679836155224 | 0.000435629309366497 | 0.0000286657199208909    |
| K15532 | 0.0000196679836155224 | 0.000435629309366497 | 0.000172093896620253     |
| K15780 | 0.0000196679836155224 | 0.000435629309366497 | 0.0000779018929100923    |

|        |                       |                      |                           |
|--------|-----------------------|----------------------|---------------------------|
| K16846 | 0.0000196679836155224 | 0.000435629309366497 | 0.00000367677986059957    |
| K17240 | 0.0000196679836155224 | 0.000435629309366497 | 0.00000741222339700479    |
| K18299 | 0.0000196679836155224 | 0.000435629309366497 | 0.00000921142364555291    |
| K18932 | 0.0000196679836155224 | 0.000435629309366497 | 0.00000000384988425045645 |
| K19714 | 0.0000196679836155224 | 0.000435629309366497 | 0.0000078206710054425     |
| K19737 | 0.0000214414515912223 | 0.000446956914548294 | 0.00000000637949509570311 |
| K00174 | 0.0000214512187006959 | 0.000446956914548294 | 0.000446048194045338      |
| K00215 | 0.0000214512187006959 | 0.000446956914548294 | 0.000714135206113125      |
| K00500 | 0.0000214512187006959 | 0.000446956914548294 | 0.0000672973770802796     |
| K00627 | 0.0000214512187006959 | 0.000446956914548294 | 0.000518089766260736      |
| K00694 | 0.0000214512187006959 | 0.000446956914548294 | 0.0000984811172832143     |
| K00891 | 0.0000214512187006959 | 0.000446956914548294 | 0.000704633038525815      |
| K01358 | 0.0000214512187006959 | 0.000446956914548294 | 0.000907768963529624      |
| K01829 | 0.0000214512187006959 | 0.000446956914548294 | 0.0000286973914765697     |
| K01950 | 0.0000214512187006959 | 0.000446956914548294 | 0.000356264566422878      |
| K02225 | 0.0000214512187006959 | 0.000446956914548294 | 0.0000474246778649206     |
| K02385 | 0.0000214512187006959 | 0.000446956914548294 | 0.0000896946329119102     |
| K02600 | 0.0000214512187006959 | 0.000446956914548294 | 0.000749668799301328      |
| K03647 | 0.0000214512187006959 | 0.000446956914548294 | 0.000236433825338674      |
| K05800 | 0.0000214512187006959 | 0.000446956914548294 | 0.000119171252084568      |
| K05919 | 0.0000214512187006959 | 0.000446956914548294 | 0.000186100237417565      |
| K06937 | 0.0000214512187006959 | 0.000446956914548294 | 0.0000326594124072282     |
| K07065 | 0.0000214512187006959 | 0.000446956914548294 | 0.0000184682464292047     |
| K07217 | 0.0000214512187006959 | 0.000446956914548294 | 0.00008970838127682       |
| K07233 | 0.0000214512187006959 | 0.000446956914548294 | 0.0000519846909634965     |

|        |                       |                      |                        |
|--------|-----------------------|----------------------|------------------------|
| K07477 | 0.0000214512187006959 | 0.000446956914548294 | 0.00000502905275253772 |
| K07506 | 0.0000214512187006959 | 0.000446956914548294 | 0.0000967298625243613  |
| K07700 | 0.0000214512187006959 | 0.000446956914548294 | 0.0000120648699085585  |
| K09951 | 0.0000214512187006959 | 0.000446956914548294 | 0.000532204794476112   |

**Table S1D.** Relative abundance of the most significant KEGG metabolic pathways in the samples collected in periodontitis sites and healthy sites as assessed by Mann-Whitney U tests with false-discovery-rate correction.

| Feature                                              | Feature    | P value                     | FDR corrected P value     | mean relative abundance healthy sites | mean relative abundance diseased sites |
|------------------------------------------------------|------------|-----------------------------|---------------------------|---------------------------------------|----------------------------------------|
| reductive acetyl coenzyme A pathway                  | CODH-PWY   | 0.0000002212196270<br>49992 | 0.000065736864567<br>5495 | 0.000494926518447<br>968              | 0.001350693672150<br>16                |
| 1,4-dihydroxy-6-naphthoate biosynthesis I            | PWY-7374   | 0.0000003017472761<br>84077 | 0.000065736864567<br>5495 | 0.000134879291272<br>032              | 0.000400221748031<br>889               |
| superpathway of menaquinol-8 biosynthesis II         | PWY-6263   | 0.0000005025462421<br>23424 | 0.000065736864567<br>5495 | 0.000674538621947<br>707              | 0.001669745111229<br>18                |
| 1,4-dihydroxy-6-naphthoate biosynthesis II           | PWY-7371   | 0.0000005559142880<br>9767  | 0.000065736864567<br>5495 | 0.000291510171363<br>232              | 0.000796956753344<br>786               |
| peptidoglycan biosynthesis IV (Enterococcus faecium) | PWY-6471   | 0.0000035302207462<br>238   | 0.000203749213739<br>465  | 0.003535550120348<br>55               | 0.002062847677681<br>24                |
| L-arginine degradation II (AST pathway)              | AST-PWY    | 0.0000038768349337<br>3189  | 0.000203749213739<br>465  | 0.000368631543101<br>274              | 0.000047653540455<br>56                |
| NAD biosynthesis II (from tryptophan)                | NADSYN-PWY | 0.0000038768349337<br>3189  | 0.000203749213739<br>465  | 0.000274024987771<br>599              | 0.000054805736821<br>6869              |

|                                                                    |            |                            |                          |                          |                           |
|--------------------------------------------------------------------|------------|----------------------------|--------------------------|--------------------------|---------------------------|
| incomplete reductive TCA cycle                                     | P42-PWY    | 0.0000038768349337<br>3189 | 0.000203749213739<br>465 | 0.005331603452304<br>98  | 0.006524192416652<br>13   |
| L-tryptophan degradation to 2-amino-3-carboxymuconate semialdehyde | PWY-5651   | 0.0000038768349337<br>3189 | 0.000203749213739<br>465 | 0.000181033735836<br>268 | 0.000034518417660<br>6504 |
| superpathway of demethylmenaquinol-6 biosynthesis II               | PWY-7373   | 0.0000051234128256<br>1339 | 0.000242337426651<br>513 | 0.000161722777380<br>462 | 0.000472951615195<br>553  |
| peptidoglycan biosynthesis V (&beta;-lactam resistance)            | PWY-6470   | 0.0000067487885949<br>0549 | 0.000268978809102<br>668 | 0.002181479521691<br>14  | 0.001029974210554<br>83   |
| L-methionine salvage cycle I (bacteria and plants)                 | PWY-7528   | 0.0000073926522586<br>3569 | 0.000268978809102<br>668 | 6.94805810427789<br>E-06 | 0.000033947041590<br>1102 |
| superpathway of thiamin diphosphate biosynthesis I                 | THISYN-PWY | 0.0000073926522586<br>3569 | 0.000268978809102<br>668 | 0.003642901451803<br>92  | 0.004678175277005<br>94   |
| L-lysine fermentation to acetate and butanoate                     | P163-PWY   | 0.0000080950142858<br>4255 | 0.000273495839800<br>252 | 0.001116284247366<br>02  | 0.002607149007282<br>7    |
| pyrimidine deoxyribonucleotides de novo biosynthesis III           | PWY-6545   | 0.0000096957440742<br>9318 | 0.000288685051445<br>38  | 0.002396034297873<br>42  | 0.003451529141881<br>92   |
| L-glutamate degradation V (via hydroxyglutarate)                   | P162-PWY   | 0.0000106054088565<br>888  | 0.000288685051445<br>38  | 0.001184128832841<br>25  | 0.002182860844402<br>45   |
| thiazole biosynthesis I (E. coli)                                  | PWY-6892   | 0.0000106054088565<br>888  | 0.000288685051445<br>38  | 0.002761414516625<br>97  | 0.004172891609622<br>33   |
| enterobacterial common antigen biosynthesis                        | ECASYN-PWY | 0.0000115962282821<br>611  | 0.000288685051445<br>38  | 0.000108454862303<br>882 | 0.000022766753323<br>8225 |
| superpathway of L-alanine biosynthesis                             | PWY0-1061  | 0.0000115962282821<br>611  | 0.000288685051445<br>38  | 0.003894059233443<br>01  | 0.001838385417548<br>24   |



|                                                               |              |                           |                          |                           |                          |
|---------------------------------------------------------------|--------------|---------------------------|--------------------------|---------------------------|--------------------------|
| hexitol fermentation to lactate, formate, ethanol and acetate | P461-PWY     | 0.0000180264872449<br>071 | 0.000387569475765<br>502 | 0.002085354793031<br>14   | 0.000943572517046<br>8   |
| pyrimidine deoxyribonucleotides de novo biosynthesis IV       | PWY-7198     | 0.0000180264872449<br>071 | 0.000387569475765<br>502 | 0.000260986553566<br>879  | 0.000623906169274<br>919 |
| pyrimidine deoxyribonucleotides biosynthesis from CTP         | PWY-7210     | 0.0000180264872449<br>071 | 0.000387569475765<br>502 | 0.000362884524019<br>541  | 0.000824782073742<br>826 |
| chorismate biosynthesis II (archaea)                          | PWY-6165     | 0.0000196589501226<br>216 | 0.000387623177089<br>254 | 0.000010555787606<br>0832 | 0.000052968195195<br>632 |
| acetylene degradation                                         | P161-PWY     | 0.0000196679836155<br>224 | 0.000387623177089<br>254 | 0.003711646978116<br>5    | 0.002002718124899<br>83  |
| pyruvate fermentation to acetone                              | PWY-6588     | 0.0000214512187006<br>959 | 0.000390247170978<br>044 | 0.002505706017967<br>52   | 0.004521814493671        |
| superpathway of thiamin diphosphate biosynthesis II           | PWY-6895     | 0.0000214512187006<br>959 | 0.000390247170978<br>044 | 0.002976053268217<br>61   | 0.004176780592580<br>7   |
| flavin biosynthesis I (bacteria and plants)                   | RIBOSYN2-PWY | 0.0000233877021067<br>009 | 0.000409717892461<br>834 | 0.005238535584218<br>13   | 0.006326352726204<br>2   |
| adenosylcobalamin salvage from cobinamide I                   | COBALSYN-PWY | 0.0000277708562078<br>396 | 0.000444998440217<br>873 | 0.003251347386102<br>32   | 0.005133876132325<br>05  |
| superpathway of demethylmenaquinol-6 biosynthesis I           | PWY-5860     | 0.0000302451334151<br>159 | 0.000444998440217<br>873 | 0.000886221846684<br>19   | 0.000392196498902<br>103 |
| adenosylcobalamin biosynthesis from cobyrate a,c-diamide I    | PWY-5509     | 0.0000329280029759<br>525 | 0.000444998440217<br>873 | 0.003159967834882<br>4    | 0.004998906667595<br>5   |
| 5-aminoimidazole ribonucleotide biosynthesis II               | PWY-6122     | 0.0000329280029759<br>525 | 0.000444998440217<br>873 | 0.006821464334067<br>57   | 0.007642417896236<br>89  |

|                                                              |            |                           |                          |                           |                           |
|--------------------------------------------------------------|------------|---------------------------|--------------------------|---------------------------|---------------------------|
| CMP-pseudamate biosynthesis                                  | PWY-6143   | 0.0000329280029759<br>525 | 0.000444998440217<br>873 | 0.000098116799923<br>0143 | 0.000349141463134<br>474  |
| superpathway of salicylate degradation                       | PWY-6182   | 0.0000329280029759<br>525 | 0.000444998440217<br>873 | 0.000345040490450<br>165  | 0.000063104754688<br>6317 |
| adenosylcobalamin salvage from cobinamide II                 | PWY-6269   | 0.0000329280029759<br>525 | 0.000444998440217<br>873 | 0.003181458702601<br>26   | 0.005042991249833<br>3    |
| superpathway of 5-aminoimidazole ribonucleotide biosynthesis | PWY-6277   | 0.0000329280029759<br>525 | 0.000444998440217<br>873 | 0.006821464334067<br>57   | 0.007642417896236<br>89   |
| superpathway of menaquinol-6 biosynthesis I                  | PWY-5850   | 0.0000358359552047<br>385 | 0.000446063337153<br>719 | 0.001144291169854<br>53   | 0.000554685863628<br>255  |
| superpathway of menaquinol-10 biosynthesis                   | PWY-5896   | 0.0000358359552047<br>385 | 0.000446063337153<br>719 | 0.001144291169854<br>53   | 0.000554685863628<br>255  |
| inosine-5'-phosphate biosynthesis III                        | PWY-7234   | 0.0000358359552047<br>385 | 0.000446063337153<br>719 | 0.004242155109390<br>54   | 0.002648928825015<br>15   |
| ADP-L-glycero-&beta;-D-manno-heptose biosynthesis            | PWY0-1241  | 0.0000460938008457<br>867 | 0.000515080102564<br>18  | 0.001341097398107<br>31   | 0.002079235277056<br>3    |
| 1,3-propanediol biosynthesis (engineered)                    | PWY-7385   | 0.0000500714942768<br>574 | 0.000515080102564<br>18  | 2.76734628774204<br>E-06  | 0.000010161176861<br>0968 |
| Calvin-Benson-Bassham cycle                                  | CALVIN-PWY | 0.0000500923566975<br>736 | 0.000515080102564<br>18  | 0.000452735549021<br>858  | 0.000092660348363<br>4548 |
| catechol degradation III (ortho-cleavage pathway)            | PWY-5417   | 0.0000500923566975<br>736 | 0.000515080102564<br>18  | 0.000452735549021<br>858  | 0.000092660348363<br>4548 |
| aromatic compounds degradation via &beta;-ketoadipate        | PWY-5431   | 0.0000500923566975<br>736 | 0.000515080102564<br>18  | 0.000886221846684<br>19   | 0.000417487467232<br>591  |

|                                                                            |                            |                           |                          |                           |                           |
|----------------------------------------------------------------------------|----------------------------|---------------------------|--------------------------|---------------------------|---------------------------|
| superpathway of demethylmenaquinol-9 biosynthesis                          | PWY-5862                   | 0.0000500923566975<br>736 | 0.000515080102564<br>18  | 0.000021718653711<br>8378 | 0.000119794532606<br>461  |
| mevalonate pathway II (archaea)                                            | PWY-6174                   | 0.0000500923566975<br>736 | 0.000515080102564<br>18  | 0.003423803854950<br>24   | 0.002357050633398<br>75   |
| superpathway of purine deoxyribonucleosides degradation                    | PWY0-1297                  | 0.0000544182261240<br>23  | 0.000527407858959<br>796 | 0.001304535739349<br>3    | 0.000648967651360<br>971  |
| superpathway of chorismate metabolism                                      | ALL-CHORISMATE-PWY         | 0.0000544182261240<br>23  | 0.000527407858959<br>796 | 0.006795227707430<br>61   | 0.007504576913830<br>69   |
| 5-aminoimidazole ribonucleotide biosynthesis I                             | PWY-6121                   | 0.0000590722747866<br>476 | 0.000527407858959<br>796 | 4.44347617111497<br>E-06  | 0.000018541049117<br>9205 |
| L-lysine biosynthesis V                                                    | PWY-3081                   | 0.0000590964408559<br>603 | 0.000527407858959<br>796 | 0.004857920864607<br>14   | 0.005452206222990<br>64   |
| pantothenate and coenzyme A biosynthesis I                                 | PANTOSYN-PWY               | 0.0000590964408559<br>603 | 0.000527407858959<br>796 | 0.001144291169854<br>53   | 0.000590964833435<br>688  |
| superpathway of menaquinol-9 biosynthesis                                  | PWY-5845                   | 0.0000590964408559<br>603 | 0.000527407858959<br>796 | 0.007343647530859<br>83   | 0.008409692388125<br>07   |
| adenosine ribonucleotides de novo biosynthesis                             | PWY-7219                   | 0.0000590964408559<br>603 | 0.000527407858959<br>796 | 0.003475836222835<br>14   | 0.004630964208044<br>77   |
| superpathway of GDP-mannose-derived O-antigen building blocks biosynthesis | PWY-7323                   | 0.0000641537954385<br>207 | 0.000551722640771<br>278 | 0.000302161805093<br>1    | 0.000063461719595<br>6713 |
| gallate degradation I                                                      | GALLATE-DEGRADATION-II-PWY | 0.0000641537954385<br>207 | 0.000551722640771<br>278 | 0.006535827545355<br>98   | 0.007147096633107<br>39   |
| UMP biosynthesis                                                           | PWY-5686                   | 0.0000696189589734<br>684 | 0.000588031564186<br>617 | 0.002608951716165<br>4    | 0.001349327067353<br>47   |

|                                                                    |                     |                           |                          |                         |                           |
|--------------------------------------------------------------------|---------------------|---------------------------|--------------------------|-------------------------|---------------------------|
| heterolactic fermentation                                          | P122-PWY            | 0.0000755225929815<br>156 | 0.000605460787800<br>964 | 0.001217296164478<br>53 | 0.001724013777542<br>31   |
| superpathway of polyamine biosynthesis I                           | POLYAMSYN-PWY       | 0.0000755225929815<br>156 | 0.000605460787800<br>964 | 0.002164420448486<br>64 | 0.001054545425885<br>9    |
| sucrose degradation IV (sucrose phosphorylase)                     | PWY-5384            | 0.0000755225929815<br>156 | 0.000605460787800<br>964 | 0.006274625175349<br>12 | 0.007039778701250<br>12   |
| chorismate biosynthesis from 3-dehydroquinate                      | PWY-6163            | 0.0000818974756486<br>839 | 0.000635041081669<br>303 | 0.001089023998172<br>97 | 0.002141663020919<br>3    |
| succinate fermentation to butanoate                                | PWY-5677            | 0.0000818974756486<br>839 | 0.000635041081669<br>303 | 0.002989507239422<br>21 | 0.003952612480484<br>11   |
| preQ0 biosynthesis                                                 | PWY-6703            | 0.0000887786327270<br>478 | 0.000666544337776<br>089 | 0.001659254979820<br>06 | 0.002751937104494<br>13   |
| thiazole biosynthesis II (Bacillus)                                | PWY-6891            | 0.0000887786327270<br>478 | 0.000666544337776<br>089 | 0.001612313332972<br>03 | 0.002537682921090<br>67   |
| cob(II)yrinate a,c-diamide biosynthesis I (early cobalt insertion) | PWY-7377            | 0.0000962034753662<br>64  | 0.000711003810128<br>795 | 0.004294657117873<br>03 | 0.002878424807340<br>86   |
| peptidoglycan maturation (meso-diaminopimelate containing)         | PWY0-1586           | 0.0001042119451580<br>89  | 0.000724886030290<br>826 | 0.002793894354953<br>1  | 0.001908055431992<br>63   |
| superpathway of hexitol degradation (bacteria)                     | HEXITOLDEGSUPER-PWY | 0.0001042119451580<br>89  | 0.000724886030290<br>826 | 0.002929841340427<br>14 | 0.001498210726861<br>97   |
| TCA cycle IV (2-oxoglutarate decarboxylase)                        | P105-PWY            | 0.0001042119451580<br>89  | 0.000724886030290<br>826 | 0.001369246380659<br>44 | 0.000602116711329<br>558  |
| superpathway of heme biosynthesis from glycine                     | PWY-5920            | 0.0001042119451580<br>89  | 0.000724886030290<br>826 | 0.000226133078153<br>31 | 0.000048078193060<br>7917 |

|                                                                      |                                        |                          |                          |                          |                           |
|----------------------------------------------------------------------|----------------------------------------|--------------------------|--------------------------|--------------------------|---------------------------|
| 4-methylcatechol degradation (ortho cleavage)                        | PWY-6185                               | 0.0001128038495411<br>05 | 0.000762521047719<br>722 | 3.04366974181011<br>E-08 | 2.80787774947345<br>E-07  |
| L-selenocysteine biosynthesis II (archaea and eukaryotes)            | PWY-6281                               | 0.0001128466666815<br>66 | 0.000762521047719<br>722 | 0.004049362198995<br>96  | 0.003168706239818<br>94   |
| mixed acid fermentation                                              | FERMENTATION-PWY                       | 0.0001221072001851<br>48 | 0.000780789459582<br>707 | 1.45616335305813<br>E-06 | 5.30836934777156<br>E-06  |
| 3-hydroxypropanoate cycle                                            | PWY-5743                               | 0.0001221072001851<br>48 | 0.000780789459582<br>707 | 1.19564269925353<br>E-08 | 3.25897680512628<br>E-07  |
| superpathway of methanogenesis                                       | PWY-6830                               | 0.0001221531078416<br>92 | 0.000780789459582<br>707 | 0.005149107853069<br>92  | 0.006377261927975<br>03   |
| superpathway of geranylgeranyl diphosphate biosynthesis II (via MEP) | PWY-5121                               | 0.0001221531078416<br>92 | 0.000780789459582<br>707 | 0.004953128916303<br>58  | 0.004329351621346<br>97   |
| pyrimidine deoxyribonucleotides de novo biosynthesis I               | PWY-7184                               | 0.0001321305468372<br>05 | 0.000791405328423<br>846 | 1.20480619307481<br>E-07 | 6.50001136954347<br>E-07  |
| 3-hydroxypropanoate/4-hydroxybutanate cycle                          | PWY-5789                               | 0.0001321797482991<br>2  | 0.000791405328423<br>846 | 0.000201881166475<br>196 | 0.000047185480036<br>3959 |
| 4-hydroxyphenylacetate degradation                                   | 3-HYDROXYPHENYLACETATE-DEGRADATION-PWY | 0.0001321797482991<br>2  | 0.000791405328423<br>846 | 0.002916240463440<br>08  | 0.001653361924537<br>42   |
| Bifidobacterium shunt                                                | P124-PWY                               | 0.0001321797482991<br>2  | 0.000791405328423<br>846 | 0.000309962543127<br>924 | 0.000070636319115<br>5441 |
| toluene degradation III (aerobic) (via p-cresol)                     | PWY-5181                               | 0.0001321797482991<br>2  | 0.000791405328423<br>846 | 0.000758744201622<br>007 | 0.000328781796233<br>62   |

|                                                                     |                  |                          |                          |                          |                           |
|---------------------------------------------------------------------|------------------|--------------------------|--------------------------|--------------------------|---------------------------|
| L-tyrosine degradation I                                            | TYRFUMCAT-PWY    | 0.0001429255459067<br>15 | 0.000834922410203<br>152 | 1.21151273398591<br>E-07 | 7.02005064091424<br>E-07  |
| 6-hydroxymethyl-dihydropterin diphosphate biosynthesis II (archaea) | PWY-6797         | 0.0001429782562927<br>17 | 0.000834922410203<br>152 | 0.006205907413728<br>07  | 0.007140226800801<br>1    |
| inosine-5'-phosphate biosynthesis I                                 | PWY-6123         | 0.0001546036741606<br>26 | 0.000881054673228<br>626 | 0.001406022806689<br>83  | 0.000927340729964<br>588  |
| urea cycle                                                          | PWY-4984         | 0.0001546036741606<br>26 | 0.000881054673228<br>626 | 0.000192903431835<br>602 | 0.000051802168080<br>9586 |
| superpathway of L-threonine metabolism                              | THREOCAT-PWY     | 0.0001671146128687<br>12 | 0.000929943669257<br>658 | 0.005300247373341<br>59  | 0.006819755569489<br>46   |
| methylerythritol phosphate pathway I                                | NONMEVIPP-PWY    | 0.0001671146128687<br>12 | 0.000929943669257<br>658 | 0.005300247373341<br>59  | 0.006819755569489<br>46   |
| methylerythritol phosphate pathway II                               | PWY-7560         | 0.0001805088009572<br>56 | 0.000981738443917<br>436 | 2.68220849050142<br>E-08 | 9.21655931886056<br>E-08  |
| crotonate fermentation (to acetate and cyclohexane carboxylate)     | PWY-7401         | 0.0001805734558579<br>64 | 0.000981738443917<br>436 | 0.001808234695354<br>15  | 0.000704707162546<br>314  |
| superpathway of glyoxylate bypass and TCA                           | TCA-GLYOX-BYPASS | 0.0001949774181429<br>69 | 0.000995587853151<br>743 | 1.89432139758495<br>E-06 | 6.20941805230835<br>E-06  |
| starch biosynthesis                                                 | PWY-622          | 0.0001949774181429<br>69 | 0.000995587853151<br>743 | 2.30508564704392<br>E-09 | 7.9216332100888E-<br>09   |
| superpathway of seleno-compound metabolism                          | PWY-6395         | 0.0001950465725243<br>99 | 0.000995587853151<br>743 | 0.000455240403643<br>121 | 0.000933076537645<br>966  |
| UDP-2,3-diacetamido-2,3-dideoxy-&alpha;-D-mannuronate biosynthesis  | PWY-7090         | 0.0002105306045027<br>51 | 0.000995587853151<br>743 | 2.60144256214352<br>E-09 | 8.97035058734885<br>E-09  |

|                                                         |                                   |                          |                          |                          |                           |
|---------------------------------------------------------|-----------------------------------|--------------------------|--------------------------|--------------------------|---------------------------|
| paromamine biosynthesis II                              | PWY-7022                          | 0.0002106045416463<br>89 | 0.000995587853151<br>743 | 0.000306421898856<br>591 | 0.000067772836132<br>9049 |
| gallate degradation II                                  | GALLATE-<br>DEGRADATION-I-PWY     | 0.0002106045416463<br>89 | 0.000995587853151<br>743 | 0.000373276964935<br>33  | 0.000084489005673<br>5354 |
| methylgallate degradation                               | METHYLGALLATE-<br>DEGRADATION-PWY | 0.0002106045416463<br>89 | 0.000995587853151<br>743 | 0.003353947336030<br>82  | 0.005036913265127<br>18   |
| pyruvate fermentation to propanoate I                   | P108-PWY                          | 0.0002106045416463<br>89 | 0.000995587853151<br>743 | 6.03840578967739<br>E-06 | 0.000019844304800<br>106  |
| Entner-Doudoroff pathway III (semi-<br>phosphorylative) | PWY-2221                          | 0.0002106045416463<br>89 | 0.000995587853151<br>743 | 0.000134159803271<br>314 | 0.000040220645763<br>7073 |
| L-tryptophan degradation IX                             | PWY-5655                          | 0.0002106045416463<br>89 | 0.000995587853151<br>743 | 2.09422088531732<br>E-06 | 7.00047819959841<br>E-06  |
| nitrifier denitrification                               | PWY-7084                          | 0.0002272433663114<br>67 | 0.000995587853151<br>743 | 1.74636271801509<br>E-07 | 5.76644842922751<br>E-07  |
| L-isoleucine degradation I                              | ILEUDEG-PWY                       | 0.0002272433663114<br>67 | 0.000995587853151<br>743 | 2.0850185050627E-<br>08  | 6.94046875171908<br>E-08  |
| Entner-Doudoroff pathway II (non-<br>phosphorylative)   | NPGLUCAT-PWY                      | 0.0002272433663114<br>67 | 0.000995587853151<br>743 | 1.72851935930711<br>E-07 | 5.70728827104619<br>E-07  |
| folate transformations I                                | PWY-2201                          | 0.0002272433663114<br>67 | 0.000995587853151<br>743 | 4.67378867689059<br>E-07 | 1.54328170558121<br>E-06  |
| nitrate reduction V (assimilatory)                      | PWY-5675                          | 0.0002272433663114<br>67 | 0.000995587853151<br>743 | 1.20570185027976<br>E-06 | 4.00490875696286<br>E-06  |
| glyoxylate assimilation                                 | PWY-5744                          | 0.0002272433663114<br>67 | 0.000995587853151<br>743 | 1.73388722699059<br>E-06 | 5.70533367140109<br>E-06  |

|                                                                                |                             |                          |                          |                          |                          |
|--------------------------------------------------------------------------------|-----------------------------|--------------------------|--------------------------|--------------------------|--------------------------|
| superpathway of the 3-hydroxypropanoate cycle                                  | PWY-7024                    | 0.0002273223850748<br>17 | 0.000995587853151<br>743 | 0.000474847331259<br>4   | 0.000107777258035<br>632 |
| catechol degradation to &beta;-ketoadipate                                     | CATECHOL-ORTHO-CLEAVAGE-PWY | 0.0002273223850748<br>17 | 0.000995587853151<br>743 | 0.008452941117151<br>22  | 0.009367625596758<br>67  |
| pentose phosphate pathway (non-oxidative branch)                               | NONOXIPENT-PWY              | 0.0002273223850748<br>17 | 0.000995587853151<br>743 | 0.004734227702030<br>15  | 0.003873220913991<br>36  |
| pentose phosphate pathway                                                      | PENTOSE-P-PWY               | 0.0002273223850748<br>17 | 0.000995587853151<br>743 | 0.002396004825811<br>23  | 0.003856563036054<br>31  |
| L-glutamate and L-glutamine biosynthesis                                       | PWY-5505                    | 0.0002273223850748<br>17 | 0.000995587853151<br>743 | 0.000053044200867<br>461 | 0.000137298737668<br>777 |
| ergothioneine biosynthesis I (bacteria)                                        | PWY-7255                    | 0.0002368537321988<br>21 | 0.001027814819541<br>67  | 9.9692796286453E-<br>09  | 4.51017892271445<br>E-08 |
| superpathway of sialic acids and CMP-sialic acids biosynthesis                 | PWY-6145                    | 0.0002449422769961<br>76 | 0.001035869206041<br>04  | 1.15410793860225<br>E-09 | 3.8205156369048E-<br>09  |
| streptomycin biosynthesis                                                      | PWY-5940                    | 0.0002452798120012<br>6  | 0.001035869206041<br>04  | 0.003582118609112<br>61  | 0.004451133040720<br>93  |
| colanic acid building blocks biosynthesis                                      | COLANSYN-PWY                | 0.0002452798120012<br>6  | 0.001035869206041<br>04  | 0.002433376859815<br>69  | 0.001253957838792<br>2   |
| superpathway of glycolysis, pyruvate dehydrogenase, TCA, and glyoxylate bypass | GLYCOLYSIS-TCA-GLYOX-BYPASS | 0.0002642010304470<br>92 | 0.001078772217740<br>65  | 1.50446121613556<br>E-09 | 4.97239979173245<br>E-09 |
| neopentalenoketolactone and pentalenate biosynthesis                           | PWY-6919                    | 0.0002645614741182<br>16 | 0.001078772217740<br>65  | 0.001814168220188<br>96  | 0.000656436963263<br>688 |
| fatty acid &beta;-oxidation I                                                  | FAO-PWY                     | 0.0002645614741182<br>16 | 0.001078772217740<br>65  | 0.004938889190693<br>76  | 0.003196052157252<br>18  |



|                                                                          |                |                          |                         |                          |                           |
|--------------------------------------------------------------------------|----------------|--------------------------|-------------------------|--------------------------|---------------------------|
| sucrose degradation III (sucrose invertase)                              | PWY-621        | 0.0002645614741182<br>16 | 0.001078772217740<br>65 | 0.000250567711947<br>11  | 0.000078054088198<br>5392 |
| phenylacetate degradation I (aerobic)                                    | PWY0-321       | 0.0002842960576832<br>84 | 0.001124388922734<br>16 | 3.30367704639228<br>E-10 | 9.76059061916559<br>E-10  |
| ribostamycin biosynthesis                                                | PWY-7015       | 0.0002852572319832<br>96 | 0.001124388922734<br>16 | 0.000122397462020<br>045 | 0.000030898002752<br>7626 |
| superpathway of L-arginine, putrescine, and 4-aminobutanoate degradation | ARGDEG-PWY     | 0.0002852572319832<br>96 | 0.001124388922734<br>16 | 0.003362234228290<br>96  | 0.004549630936760<br>35   |
| lipid IVA biosynthesis                                                   | NAGLIPASYN-PWY | 0.0002852572319832<br>96 | 0.001124388922734<br>16 | 0.000122397462020<br>045 | 0.000030898002752<br>7626 |
| superpathway of L-arginine and L-ornithine degradation                   | ORNARGDEG-PWY  | 0.0003070519008775<br>7  | 0.001163437846079<br>39 | 6.49140647224054<br>E-10 | 2.13605215297629<br>E-09  |
| paromamine biosynthesis I                                                | PWY-7014       | 0.0003070519008775<br>7  | 0.001163437846079<br>39 | 6.78411456715374<br>E-10 | 2.23725197709979<br>E-09  |
| mevalonate pathway III (archaea)                                         | PWY-7524       | 0.0003074624328962<br>44 | 0.001163437846079<br>39 | 0.006136237285293<br>22  | 0.006509163651255<br>1    |
| chorismate biosynthesis I                                                | ARO-PWY        | 0.0003074624328962<br>44 | 0.001163437846079<br>39 | 0.006034647919069<br>58  | 0.006703420152404<br>73   |
| coenzyme A biosynthesis I                                                | COA-PWY        | 0.0003074624328962<br>44 | 0.001163437846079<br>39 | 0.005699099823389<br>72  | 0.005149274081541<br>13   |
| superpathway of guanosine nucleotides de novo biosynthesis I             | PWY-7228       | 0.0003312782005934<br>18 | 0.001243607848259<br>42 | 0.000236153759226<br>996 | 0.000113510296564<br>178  |
| superpathway of glycerol degradation to 1,3-propanediol                  | GOLPDLCAT-PWY  | 0.0003568117370591<br>08 | 0.001328913004952<br>43 | 0.006383384369405<br>38  | 0.007293953935872<br>46   |

|                                                               |                   |                          |                         |                           |                           |
|---------------------------------------------------------------|-------------------|--------------------------|-------------------------|---------------------------|---------------------------|
| tRNA charging                                                 | TRNA-CHARGING-PWY | 0.0003840522194053<br>84 | 0.001419192967021<br>46 | 0.000017494539490<br>3833 | 0.000060790945975<br>3789 |
| reductive TCA cycle II                                        | PWY-5392          | 0.0004133606754619<br>39 | 0.001515655810027<br>11 | 1.98306250228997<br>E-06  | 4.98606794753847<br>E-06  |
| sitosterol degradation to androstenedione                     | PWY-6948          | 0.0004448888404089<br>26 | 0.001618710934718<br>63 | 0.007380978762816<br>3    | 0.008224659747450<br>94   |
| superpathway of adenosine nucleotides de novo biosynthesis I  | PWY-7229          | 0.0004778976192952<br>92 | 0.001689027591915<br>16 | 4.9196137027867E-<br>10   | 1.45076198432908<br>E-09  |
| superpathway of butirocin biosynthesis                        | PWY-7020          | 0.0004783480823133<br>56 | 0.001689027591915<br>16 | 0.000022925997033<br>2246 | 0.000116587897573<br>188  |
| coenzyme B biosynthesis                                       | P241-PWY          | 0.0004784983029949<br>93 | 0.001689027591915<br>16 | 0.007025934307087<br>91   | 0.007864307674577<br>63   |
| superpathway of adenosine nucleotides de novo biosynthesis II | PWY-6126          | 0.0004784983029949<br>93 | 0.001689027591915<br>16 | 0.000104846795875<br>007  | 0.000275275512326<br>133  |
| protein N-glycosylation (bacterial)                           | PWY-7031          | 0.0005144641657591<br>73 | 0.001802530002993<br>25 | 0.003474025306223<br>2    | 0.004355091942958<br>18   |
| CMP-3-deoxy-D-manno-octulosonate biosynthesis I               | PWY-1269          | 0.0005529371525551<br>78 | 0.001895212124337<br>67 | 0.000185460208450<br>963  | 0.000059885351598<br>1832 |
| toluene degradation IV (aerobic) (via catechol)               | PWY-5178          | 0.0005529371525551<br>78 | 0.001895212124337<br>67 | 0.006265080557708<br>58   | 0.006842015741013<br>12   |
| peptidoglycan biosynthesis III (mycobacteria)                 | PWY-6385          | 0.0005529371525551<br>78 | 0.001895212124337<br>67 | 0.001297793710215<br>05   | 0.000603241493661<br>769  |
| mevalonate pathway I                                          | PWY-922           | 0.0005940765408778<br>92 | 0.001978860590389<br>04 | 1.99956857664599<br>E-06  | 6.11725390593094<br>E-06  |

|                                                                           |                 |                          |                         |                           |                           |
|---------------------------------------------------------------------------|-----------------|--------------------------|-------------------------|---------------------------|---------------------------|
| benzoyl-CoA degradation II (anaerobic)                                    | CENTBENZCOA-PWY | 0.0005940765408778<br>92 | 0.001978860590389<br>04 | 0.000041359410604<br>9813 | 0.000173335810038<br>483  |
| coenzyme M biosynthesis I                                                 | P261-PWY        | 0.0005940765408778<br>92 | 0.001978860590389<br>04 | 0.000063665446868<br>6651 | 0.000180301416251<br>358  |
| sucrose degradation II (sucrose synthase)                                 | PWY-3801        | 0.0005940765408778<br>92 | 0.001978860590389<br>04 | 0.000173821777935<br>861  | 0.000028981499525<br>3523 |
| polymyxin resistance                                                      | PWY0-1338       | 0.0006380505703199<br>59 | 0.002039175133522<br>57 | 0.000138715181270<br>575  | 0.000272273754638<br>336  |
| glycolysis V (Pyrococcus)                                                 | P341-PWY        | 0.0006380505703199<br>59 | 0.002039175133522<br>57 | 0.002011826525660<br>81   | 0.002933232367552<br>88   |
| acetyl-CoA fermentation to butanoate II                                   | PWY-5676        | 0.0006380505703199<br>59 | 0.002039175133522<br>57 | 0.001623829337754<br>1    | 0.000814694516367<br>718  |
| superpathway of geranylgeranyldiphosphate biosynthesis I (via mevalonate) | PWY-5910        | 0.0006380505703199<br>59 | 0.002039175133522<br>57 | 0.000915605345681<br>968  | 0.000500044739134<br>92   |
| superpathway of 2,3-butanediol biosynthesis                               | PWY-6396        | 0.0006380505703199<br>59 | 0.002039175133522<br>57 | 0.000450023320672<br>417  | 0.000148688406627<br>122  |
| 2-methylcitrate cycle I                                                   | PWY0-42         | 0.0006380505703199<br>59 | 0.002039175133522<br>57 | 0.003278747300273<br>66   | 0.002359998213569<br>19   |
| TCA cycle VIII (helicobacter)                                             | REDCITCYC       | 0.0006848328775735<br>56 | 0.002104041800807<br>62 | 1.19688490564676<br>E-06  | 0.000041279683258<br>374  |
| CDP-archaeol biosynthesis                                                 | PWY-6349        | 0.0006848328775735<br>56 | 0.002104041800807<br>62 | 1.41134924073927<br>E-06  | 0.000042281106314<br>2697 |
| archaetidylinositol biosynthesis                                          | PWY-6350        | 0.0006850368653792<br>26 | 0.002104041800807<br>62 | 0.005922180757638<br>72   | 0.006359802634954<br>48   |

|                                                                |                                    |                          |                         |                           |                           |
|----------------------------------------------------------------|------------------------------------|--------------------------|-------------------------|---------------------------|---------------------------|
| gluconeogenesis I                                              | GLUCONEO-PWY                       | 0.0006850368653792<br>26 | 0.002104041800807<br>62 | 0.006335235869553<br>55   | 0.006903771047022<br>1    |
| peptidoglycan biosynthesis I (meso-diaminopimelate containing) | PEPTIDOGLYCANSYN-PWY               | 0.0006850368653792<br>26 | 0.002104041800807<br>62 | 0.000490731411246<br>94   | 0.000109406480177<br>776  |
| syringate degradation                                          | PWY-6339                           | 0.0006850368653792<br>26 | 0.002104041800807<br>62 | 0.000461391772241<br>657  | 0.000790878588739<br>43   |
| methylaspartate cycle                                          | PWY-6728                           | 0.0007352228727858<br>61 | 0.002243615605340<br>08 | 0.006308113499245<br>82   | 0.006670945249369<br>86   |
| superpathway of aromatic amino acid biosynthesis               | COMPLETE-ARO-PWY                   | 0.0007885764281363<br>76 | 0.002346574756499<br>65 | 0.000015727553820<br>2767 | 0.000110121816706<br>357  |
| methanogenesis from H2 and CO2                                 | METHANOGENESIS-PWY                 | 0.0007888063134956<br>55 | 0.002346574756499<br>65 | 0.001798273307763<br>77   | 0.002250290033224<br>4    |
| superpathway of arginine and polyamine biosynthesis            | ARG+POLYAMINE-SYN                  | 0.0007888063134956<br>55 | 0.002346574756499<br>65 | 0.004018257255433<br>51   | 0.003322150349412<br>89   |
| L-methionine biosynthesis III                                  | HSERMETANA-PWY                     | 0.0007888063134956<br>55 | 0.002346574756499<br>65 | 0.000101583735116<br>364  | 0.000038663076768<br>8974 |
| superpathway of aerobic toluene degradation                    | PWY-5183                           | 0.0008435588712467<br>08 | 0.002454944430675<br>96 | 4.46387012303079<br>E-10  | 1.22426394584108<br>E-09  |
| butirosin biosynthesis                                         | PWY-7019                           | 0.0008459956494718<br>41 | 0.002454944430675<br>96 | 0.000780594205900<br>617  | 0.000306705620093<br>583  |
| protocatechuate degradation II (ortho-cleavage pathway)        | PROTocatechuate-ORTHO-CLEAVAGE-PWY | 0.0008459956494718<br>41 | 0.002454944430675<br>96 | 0.000193496035140<br>351  | 0.000067457727100<br>6742 |
| superpathway of phenylethylamine degradation                   | PWY-6071                           | 0.0008459956494718<br>41 | 0.002454944430675<br>96 | 0.001601291422059<br>48   | 0.000740415498396<br>242  |

|                                                                                    |                   |                          |                         |                           |                           |
|------------------------------------------------------------------------------------|-------------------|--------------------------|-------------------------|---------------------------|---------------------------|
| fatty acid salvage                                                                 | PWY-7094          | 0.0009067519189974<br>68 | 0.002568958068331<br>11 | 1.27331214377164<br>E-06  | 0.000055200051953<br>2944 |
| tetrahydromethanopterin biosynthesis                                               | PWY-6148          | 0.0009070105653515<br>74 | 0.002568958068331<br>11 | 0.004609394186368<br>55   | 0.003904695603224<br>84   |
| superpathway of histidine, purine, and pyrimidine biosynthesis                     | PRPP-PWY          | 0.0009070105653515<br>74 | 0.002568958068331<br>11 | 0.000086071309960<br>2577 | 0.000025677165955<br>4684 |
| 2-nitrobenzoate degradation I                                                      | PWY-5647          | 0.0009070105653515<br>74 | 0.002568958068331<br>11 | 0.004337451619855<br>92   | 0.003554845323258<br>13   |
| superpathway of pyrimidine deoxyribonucleotides de novo biosynthesis               | PWY-7211          | 0.0009262748738811<br>01 | 0.002592473463584<br>38 | 2.260001962782E-<br>11    | 9.96325569585817<br>E-11  |
| superpathway of erythromycin biosynthesis                                          | PWY-6977          | 0.0009262748738811<br>01 | 0.002592473463584<br>38 | 2.260001962782E-<br>11    | 9.68681852649075<br>E-11  |
| superpathway of megalomicin A biosynthesis                                         | PWY-7110          | 0.0009718082846448<br>13 | 0.002688859684068<br>64 | 3.39140096368807<br>E-07  | 8.50700969741689<br>E-07  |
| cholesterol degradation to androstenedione II (cholesterol dehydrogenase)          | PWY-6946          | 0.0009720824650649<br>83 | 0.002688859684068<br>64 | 0.004374087699778<br>67   | 0.003909779679593<br>06   |
| pyrimidine deoxyribonucleotide phosphorylation                                     | PWY-7197          | 0.0010414549834444       | 0.002847446284215<br>04 | 0.001463744675172<br>56   | 0.000669333821834<br>835  |
| glyoxylate cycle                                                                   | GLYOXYLATE-BYPASS | 0.0010414549834444       | 0.002847446284215<br>04 | 0.006440898686224<br>17   | 0.006998487076626<br>69   |
| UDP-N-acetylmuramoyl-pentapeptide biosynthesis I (meso-diaminopimelate containing) | PWY-6387          | 0.0011150767892177<br>4  | 0.002997595878227<br>72 | 1.15876115842117<br>E-06  | 0.000059492535540<br>6848 |
| phosphopantothenate biosynthesis III                                               | PWY-6654          | 0.0011153845128289<br>2  | 0.002997595878227<br>72 | 0.000242177654701<br>391  | 0.000433537656095<br>744  |

|                                                                            |                  |                         |                         |                           |                           |
|----------------------------------------------------------------------------|------------------|-------------------------|-------------------------|---------------------------|---------------------------|
| methanogenesis from acetate                                                | METH-ACETATE-PWY | 0.0011153845128289<br>2 | 0.002997595878227<br>72 | 0.003272384310588<br>66   | 0.002531711128828<br>13   |
| superpathway of pyrimidine deoxyribonucleosides degradation                | PWY0-1298        | 0.0011332192423981<br>2 | 0.003028320348329<br>45 | 6.36551430173179<br>E-12  | 4.61114511692195<br>E-11  |
| erythromycin D biosynthesis                                                | PWY-7106         | 0.0011941407446348      | 0.003137936512290<br>33 | 0.001162059179528<br>99   | 0.000579965596822<br>105  |
| lactose and galactose degradation I                                        | LACTOSECAT-PWY   | 0.0011941407446348      | 0.003137936512290<br>33 | 1.19027733081359<br>E-06  | 2.74649239934819<br>E-06  |
| toluene degradation VI (anaerobic)                                         | PWY-5184         | 0.0011941407446348      | 0.003137936512290<br>33 | 0.000581408764737<br>014  | 0.000189062833531<br>447  |
| 2-methylcitrate cycle II                                                   | PWY-5747         | 0.0012766283845406<br>8 | 0.003215411796890<br>53 | 1.32573724435626<br>E-06  | 1.36789989450808<br>E-09  |
| superpathway of mycolyl-arabinogalactan-peptidoglycan complex biosynthesis | PWY-6404         | 0.0012776624239361      | 0.003215411796890<br>53 | 0.000036910242831<br>6905 | 0.000118421336375<br>411  |
| gluconeogenesis II (Methanobacterium thermoautotrophicum)                  | PWY-6142         | 0.0012776624239361      | 0.003215411796890<br>53 | 1.03307648511157<br>E-06  | 0.000093212668037<br>4041 |
| flavin biosynthesis II (archaea)                                           | PWY-6167         | 0.0012776624239361      | 0.003215411796890<br>53 | 3.49758151579925<br>E-07  | 0.000039966421649<br>4431 |
| 7-(3-amino-3-carboxypropyl)-wyosine biosynthesis                           | PWY-7286         | 0.0012780072258254<br>1 | 0.003215411796890<br>53 | 0.006657330541289<br>03   | 0.007128338038021<br>95   |
| glycolysis I (from glucose 6-phosphate)                                    | GLYCOLYSIS       | 0.0012780072258254<br>1 | 0.003215411796890<br>53 | 0.006334699289531<br>58   | 0.006882869158844<br>99   |
| UDP-N-acetylmuramoyl-pentapeptide biosynthesis II (lysine-containing)      | PWY-6386         | 0.0012780072258254<br>1 | 0.003215411796890<br>53 | 0.000581482203621<br>785  | 0.001021805213359<br>13   |

|                                                              |             |                         |                         |                           |                           |
|--------------------------------------------------------------|-------------|-------------------------|-------------------------|---------------------------|---------------------------|
| GDP-D-glycero-&alpha;-D-manno-heptose biosynthesis           | PWY-6478    | 0.0012780072258254<br>1 | 0.003215411796890<br>53 | 0.001535638385315<br>18   | 0.000983332468582<br>862  |
| superpathway of heme biosynthesis from uroporphyrinogen-III  | PWY0-1415   | 0.0013672819301753<br>2 | 0.003333630685427<br>45 | 0.003533490244285<br>3    | 0.002905321645198<br>93   |
| L-ornithine biosynthesis                                     | GLUTORN-PWY | 0.0013672819301753<br>2 | 0.003333630685427<br>45 | 0.001300899092979<br>54   | 0.001945293541414<br>76   |
| photorespiration                                             | PWY-181     | 0.0013672819301753<br>2 | 0.003333630685427<br>45 | 0.005891007029663<br>12   | 0.006711754145657<br>85   |
| pyruvate fermentation to acetate and lactate II              | PWY-5100    | 0.0013672819301753<br>2 | 0.003333630685427<br>45 | 0.006679625456439<br>52   | 0.007117815057383<br>64   |
| guanosine ribonucleotides de novo biosynthesis               | PWY-7221    | 0.0013672819301753<br>2 | 0.003333630685427<br>45 | 0.003423441092325<br>44   | 0.002508031919726<br>99   |
| purine ribonucleosides degradation                           | PWY0-1296   | 0.0013672819301753<br>2 | 0.003333630685427<br>45 | 0.000504697760101<br>567  | 0.000243729282167<br>928  |
| methylphosphonate degradation I                              | PWY0-1533   | 0.0014618921337408<br>5 | 0.003528864389275<br>17 | 0.000007501436569<br>4816 | 0.000019783689572<br>111  |
| mannosylglycerate biosynthesis I                             | PWY-5656    | 0.0014622778441816<br>8 | 0.003528864389275<br>17 | 0.007205518676445<br>22   | 0.007920207249719<br>01   |
| superpathway of pyrimidine nucleobases salvage               | PWY-7208    | 0.0015633235674326<br>4 | 0.003753563692363<br>64 | 0.000211037286996<br>612  | 0.000063112499553<br>0554 |
| 3-phenylpropanoate degradation                               | P281-PWY    | 0.0017845056700623<br>5 | 0.004262985767371<br>18 | 0.000001334368720<br>2148 | 0.000047098875999<br>9314 |
| Methanobacterium thermoautotrophicum biosynthetic metabolism | PWY-6146    | 0.0020346509993927<br>4 | 0.004813148214213<br>37 | 3.13100494043165<br>E-07  | 0.000036251759846<br>2128 |

|                                                               |               |                         |                         |                           |                           |
|---------------------------------------------------------------|---------------|-------------------------|-------------------------|---------------------------|---------------------------|
| archaetidylserine and<br>archaetidylethanolamine biosynthesis | PWY-6141      | 0.0020351578072783<br>8 | 0.004813148214213<br>37 | 0.000844661919010<br>2    | 0.000458072265419<br>947  |
| myo-inositol degradation I                                    | P562-PWY      | 0.0021719718205802<br>3 | 0.005085854807596<br>28 | 0.002682277276022<br>28   | 0.003653849906900<br>34   |
| L-histidine degradation I                                     | HISDEG-PWY    | 0.0021719718205802<br>3 | 0.005085854807596<br>28 | 0.000018251440465<br>5821 | 0.000048309824721<br>7487 |
| androstenedione degradation                                   | PWY-6944      | 0.0022801231740872<br>8 | 0.005269334811165<br>85 | 2.51504915343216<br>E-12  | 6.65411457118316<br>E-11  |
| pentalenolactone biosynthesis                                 | PWY-6915      | 0.0022809798815085      | 0.005269334811165<br>85 | 6.36551430173179<br>E-12  | 4.36311252483613<br>E-11  |
| tylosin biosynthesis                                          | PWY-7415      | 0.0023171704877854      | 0.005269334811165<br>85 | 0.000259634405577<br>346  | 0.000076552488488<br>7063 |
| superpathway of ornithine degradation                         | ORNDEG-PWY    | 0.0023171704877854      | 0.005269334811165<br>85 | 0.004157747039846<br>64   | 0.003788849209701<br>59   |
| superpathway of pyrimidine<br>deoxyribonucleoside salvage     | PWY-7200      | 0.0023171704877854      | 0.005269334811165<br>85 | 0.003272788563132<br>04   | 0.002183391700192<br>51   |
| D-fructuronate degradation                                    | PWY-7242      | 0.0023171704877854      | 0.005269334811165<br>85 | 0.004209276597927<br>34   | 0.003634104216803<br>13   |
| anhydromuropeptides recycling                                 | PWY0-1261     | 0.0024706156084006<br>8 | 0.005539725925949<br>05 | 5.07689144000859<br>E-07  | 1.45293313814208<br>E-06  |
| xylose degradation III                                        | PWY-6760      | 0.0024712096625269<br>6 | 0.005539725925949<br>05 | 0.001279960535716<br>64   | 0.000570395524344<br>194  |
| enterobactin biosynthesis                                     | ENTBACSYN-PWY | 0.0024712096625269<br>6 | 0.005539725925949<br>05 | 0.000146768228148<br>806  | 0.000057909834533<br>3786 |



|                                                               |                    |                         |                         |                           |                           |
|---------------------------------------------------------------|--------------------|-------------------------|-------------------------|---------------------------|---------------------------|
| meta cleavage pathway of aromatic compounds                   | PWY-5430           | 0.0026345660958435<br>1 | 0.005878064921386<br>69 | 0.000015175116716<br>4381 | 0.000094950322500<br>6425 |
| factor 420 biosynthesis                                       | PWY-5198           | 0.0028077381497495<br>5 | 0.006235024154138<br>66 | 0.006550523917395<br>86   | 0.005162054410889<br>17   |
| pyruvate fermentation to isobutanol (engineered)              | PWY-7111           | 0.0031514884004469<br>2 | 0.006965672959866<br>32 | 2.31381551423029<br>E-07  | 4.64326610558964<br>E-07  |
| anaerobic aromatic compound degradation (Thauera aromatica)   | BENZCOA-PWY        | 0.0031856349704060<br>2 | 0.007008396934893<br>24 | 0.004485124629243<br>32   | 0.004950249541937<br>45   |
| phosphopantothenate biosynthesis I                            | PANTO-PWY          | 0.0033914710682818<br>1 | 0.007258668847499<br>07 | 0.004125615597824<br>29   | 0.005091236519124<br>86   |
| superpathway of L-aspartate and L-asparagine biosynthesis     | ASPASN-PWY         | 0.0033914710682818<br>1 | 0.007258668847499<br>07 | 0.003651015175223<br>08   | 0.003032874838263<br>43   |
| L-methionine biosynthesis I                                   | HOMOSER-METSYN-PWY | 0.0033914710682818<br>1 | 0.007258668847499<br>07 | 0.000319278912712<br>47   | 0.000075827264533<br>2694 |
| protocatechuate degradation I (meta-cleavage pathway)         | P184-PWY           | 0.0033914710682818<br>1 | 0.007258668847499<br>07 | 0.004910988657010<br>1    | 0.005464689335814<br>1    |
| polyisoprenoid biosynthesis (E. coli)                         | POLYISOPRENSYN-PWY | 0.0033914710682818<br>1 | 0.007258668847499<br>07 | 0.000031726347803<br>5459 | 0.000004087596314<br>3231 |
| chlorosalicylate degradation                                  | PWY-6107           | 0.0033914710682818<br>1 | 0.007258668847499<br>07 | 0.005654081899648<br>85   | 0.005308760286282<br>89   |
| superpathway of guanosine nucleotides de novo biosynthesis II | PWY-6125           | 0.0038398800013550<br>5 | 0.008108318038575<br>61 | 0.006673781613904<br>85   | 0.007177822455658<br>57   |
| glycolysis III (from glucose)                                 | ANAGLYCOLYSIS-PWY  | 0.0038398800013550<br>5 | 0.008108318038575<br>61 | 5.78173296735349<br>E-06  | 0.000014259904223<br>538  |

|                                                                                        |                  |                          |                         |                          |                           |
|----------------------------------------------------------------------------------------|------------------|--------------------------|-------------------------|--------------------------|---------------------------|
| toluene degradation V (aerobic) (via toluene-cis-diol)                                 | PWY-5179         | 0.0038398800013550<br>5  | 0.008108318038575<br>61 | 0.003570370353935<br>53  | 0.004288545216944<br>55   |
| NAD salvage pathway I                                                                  | PYRIDNUCSAL-PWY  | 0.0040837137563018<br>55 | 0.008546887640401<br>55 | 0.000368152318422<br>296 | 0.000121760365503<br>336  |
| L-histidine degradation II                                                             | PWY-5028         | 0.0040837137563018<br>55 | 0.008546887640401<br>55 | 0.006547612337898<br>87  | 0.007477500712943<br>53   |
| urate biosynthesis/inosine 5'-phosphate degradation                                    | PWY-5695         | 0.0043415185177975<br>6  | 0.009046424048098       | 0.005017139052493<br>8   | 0.005589043840484<br>59   |
| 6-hydroxymethyl-dihydropterin diphosphate biosynthesis III (Chlamydia)                 | PWY-7539         | 0.0046139921918485<br>9  | 0.009572010117299<br>92 | 0.004695901220142<br>99  | 0.004099627800468<br>88   |
| galactose degradation I (Leloir pathway)                                               | PWY-6317         | 0.0050323791136614<br>9  | 0.010394390046994<br>9  | 2.51504915343216<br>E-12 | 2.6321529524165E-<br>11   |
| dTDP-6-deoxy-&alpha;-D-allose biosynthesis                                             | PWY-7413         | 0.0052048005704251<br>8  | 0.010568160711701       | 2.39126003547435<br>E-06 | 6.38660577585327<br>E-06  |
| D-arabinose degradation III                                                            | PWY-5519         | 0.0052058804351508<br>3  | 0.010568160711701       | 0.004116340490989<br>8   | 0.003705744937562<br>99   |
| superpathway of L-lysine, L-threonine and L-methionine biosynthesis I                  | P4-PWY           | 0.0052058804351508<br>3  | 0.010568160711701       | 0.002067472635621<br>78  | 0.001314940407340<br>45   |
| TCA cycle VII (acetate-producers)                                                      | PWY-7254         | 0.0052058804351508<br>3  | 0.010568160711701       | 0.001962631637747<br>65  | 0.002888193140320<br>69   |
| superpathway of UDP-N-acetylglucosamine-derived O-antigen building blocks biosynthesis | PWY-7332         | 0.0055268356413798<br>8  | 0.010984005287280<br>2  | 0.004367151859767<br>38  | 0.003841126499904<br>86   |
| L-lysine biosynthesis I                                                                | DAPLYSINESYN-PWY | 0.0055268356413798<br>8  | 0.010984005287280<br>2  | 0.000236726298533<br>631 | 0.000059136397771<br>8484 |

|                                                                            |                         |                         |                        |                          |                          |
|----------------------------------------------------------------------------|-------------------------|-------------------------|------------------------|--------------------------|--------------------------|
| ketogluconate metabolism                                                   | KETOGLUCONMET-PWY       | 0.0055268356413798<br>8 | 0.010984005287280<br>2 | 0.000394475154321<br>69  | 0.000685801202271<br>18  |
| biotin biosynthesis II                                                     | PWY-5005                | 0.0055268356413798<br>8 | 0.010984005287280<br>2 | 0.004913621314567<br>9   | 0.005459648335026<br>04  |
| GDP-mannose biosynthesis                                                   | PWY-5659                | 0.0055268356413798<br>8 | 0.010984005287280<br>2 | 0.002848368120092<br>02  | 0.003573767725830<br>43  |
| Kdo transfer to lipid IVA III (Chlamydia)                                  | PWY-6467                | 0.0056548853126238<br>4 | 0.011191467585234<br>6 | 6.36551430173179<br>E-12 | 3.85322076834987<br>E-11 |
| superpathway of erythromycin biosynthesis (without sugar biosynthesis)     | PWY-6975                | 0.00622284847119        | 0.012112787353386<br>3 | 0.001067520979861<br>78  | 0.000661893528028<br>138 |
| L-leucine degradation I                                                    | LEU-DEG2-PWY            | 0.00622284847119        | 0.012112787353386<br>3 | 0.004532978772422<br>78  | 0.004074117014777<br>77  |
| superpathway of S-adenosyl-L-methionine biosynthesis                       | MET-SAM-PWY             | 0.00622284847119        | 0.012112787353386<br>3 | 0.004079028325147<br>36  | 0.003715644109330<br>75  |
| aspartate superpathway                                                     | PWY0-781                | 0.00622284847119        | 0.012112787353386<br>3 | 0.001612984705313<br>03  | 0.000979327178303<br>137 |
| superpathway of ubiquinol-8 biosynthesis (prokaryotic)                     | UBISYN-PWY              | 0.0065996328213927      | 0.012741331936811<br>2 | 0.001370171166222<br>32  | 0.000832052906329<br>567 |
| glucose and glucose-1-phosphate degradation                                | GLUCOSE1PMETAB-PWY      | 0.0065996328213927      | 0.012741331936811<br>2 | 0.002035053858334<br>26  | 0.001408929787049<br>24  |
| superpathway of UDP-glucose-derived O-antigen building blocks biosynthesis | PWY-7328                | 0.0069968079197863<br>2 | 0.013237960584235<br>7 | 0.003073876825527<br>12  | 0.003803087400402<br>64  |
| biotin biosynthesis I                                                      | BIOTIN-BIOSYNTHESIS-PWY | 0.0069968079197863<br>2 | 0.013237960584235<br>7 | 0.001636174682751<br>26  | 0.000985281125366<br>759 |

|                                                     |                    |                         |                        |                          |                           |
|-----------------------------------------------------|--------------------|-------------------------|------------------------|--------------------------|---------------------------|
| ubiquinol-7 biosynthesis (prokaryotic)              | PWY-5855           | 0.0069968079197863<br>2 | 0.013237960584235<br>7 | 0.001636174682751<br>26  | 0.000985281125366<br>759  |
| ubiquinol-9 biosynthesis (prokaryotic)              | PWY-5856           | 0.0069968079197863<br>2 | 0.013237960584235<br>7 | 0.001636174682751<br>26  | 0.000985281125366<br>759  |
| ubiquinol-10 biosynthesis (prokaryotic)             | PWY-5857           | 0.0069968079197863<br>2 | 0.013237960584235<br>7 | 0.001636174682751<br>26  | 0.000985281125366<br>759  |
| ubiquinol-8 biosynthesis (prokaryotic)              | PWY-6708           | 0.0078561483669862<br>4 | 0.014687581729583      | 0.000429280537302<br>05  | 0.000105316344867<br>547  |
| glycine betaine degradation I                       | PWY-3661           | 0.0078561483669862<br>4 | 0.014687581729583      | 4.95707006065288<br>E-06 | 8.06521695039678<br>E-06  |
| D-galacturonate degradation II                      | PWY-6486           | 0.0078561483669862<br>4 | 0.014687581729583      | 0.004273205832675<br>01  | 0.004736203994137<br>73   |
| thiamin salvage II                                  | PWY-6897           | 0.0083203092261884      | 0.015313253945475<br>2 | 0.000271232003602<br>766 | 0.000059062476488<br>5813 |
| superpathway of vanillin and vanillate degradation  | PWY-6338           | 0.0083203092261884      | 0.015313253945475<br>2 | 0.000271232003602<br>766 | 0.000059062476488<br>5813 |
| vanillin and vanillate degradation I                | PWY-7097           | 0.0083203092261884      | 0.015313253945475<br>2 | 0.000299731197001<br>97  | 0.000065101179224<br>8229 |
| vanillin and vanillate degradation II               | PWY-7098           | 0.0083203092261884      | 0.015313253945475<br>2 | 0.005488692048512<br>63  | 0.006102242075338<br>07   |
| superpathway of L-serine and glycine biosynthesis I | SER-GLYSYN-PWY     | 0.0093228677519123<br>6 | 0.017091924211839<br>3 | 0.001128336770101<br>33  | 0.000555962374886<br>31   |
| superpathway of (Kdo)2-lipid A biosynthesis         | KDO-NAGLIPASYN-PWY | 0.0098634771274733<br>7 | 0.017943941081903<br>5 | 0.000120722394449<br>442 | 0.000016447504102<br>8527 |

|                                                                            |                         |                         |                        |                           |                           |
|----------------------------------------------------------------------------|-------------------------|-------------------------|------------------------|---------------------------|---------------------------|
| starch degradation III                                                     | PWY-6731                | 0.0098634771274733<br>7 | 0.017943941081903<br>5 | 0.001416540420739<br>15   | 0.001813873665806<br>58   |
| glycerol degradation to butanol                                            | PWY-7003                | 0.0100407217538355      | 0.018196403791433<br>6 | 4.5068627682329E-<br>11   | 1.21607612640207<br>E-10  |
| superpathway of atrazine degradation                                       | PWY-5724                | 0.0104299968962077      | 0.018704863807517<br>1 | 1.67884072650417<br>E-06  | 2.62186874022481<br>E-06  |
| vitamin E biosynthesis (tocopherols)                                       | PWY-1422                | 0.0104318433642815      | 0.018704863807517<br>1 | 0.003598899618647<br>91   | 0.004169650639066<br>03   |
| NAD biosynthesis I (from aspartate)                                        | PYRIDNUCSYN-PWY         | 0.0104399239855909      | 0.018704863807517<br>1 | 0                         | 1.68766610408278<br>E-11  |
| aclacinomycin biosynthesis                                                 | PWY-7354                | 0.0110291666911012      | 0.019612014454476<br>9 | 0.006959096255425<br>13   | 0.007768675367864<br>27   |
| adenosine deoxyribonucleotides de novo biosynthesis II                     | PWY-7220                | 0.0110291666911012      | 0.019612014454476<br>9 | 0.006959096255425<br>13   | 0.007768675367864<br>27   |
| guanosine deoxyribonucleotides de novo biosynthesis II                     | PWY-7222                | 0.0116566861323972      | 0.020573181121730<br>9 | 0.000079607597171<br>2189 | 7.69352637543703<br>E-06  |
| glucose degradation (oxidative)                                            | DHGLUCONATE-PYR-CAT-PWY | 0.0116566861323972      | 0.020573181121730<br>9 | 4.41359101503416<br>E-06  | 0.000012260356875<br>3206 |
| superpathway of CDP-glucose-derived O-antigen building blocks biosynthesis | PWY-5823                | 0.0130074666079587      | 0.022703069024223<br>1 | 0.000636887179887<br>407  | 0.001060472628018<br>99   |
| superpathway of sulfur oxidation (Acidianus ambivalens)                    | PWY-5304                | 0.0130074666079587      | 0.022703069024223<br>1 | 0.005067690537566<br>52   | 0.005632000142993<br>92   |
| 6-hydroxymethyl-dihydropterin diphosphate biosynthesis I                   | PWY-6147                | 0.0130074666079587      | 0.022703069024223<br>1 | 0.000235203943838<br>664  | 0.000330577318135<br>843  |

|                                                                       |                |                    |                        |                           |                           |
|-----------------------------------------------------------------------|----------------|--------------------|------------------------|---------------------------|---------------------------|
| allantoin degradation IV (anaerobic)                                  | PWY0-41        | 0.0137334043088943 | 0.023621455411298<br>2 | 0.002154572631272<br>71   | 0.001533512078240<br>26   |
| L-lysine biosynthesis II                                              | PWY-2941       | 0.0137334043088943 | 0.023621455411298<br>2 | 0.004474604079763<br>76   | 0.003865532543361<br>67   |
| S-adenosyl-L-methionine cycle I                                       | PWY-6151       | 0.0137334043088943 | 0.023621455411298<br>2 | 0.001022779939919<br>84   | 0.001328544728246<br>27   |
| superpathway of Clostridium acetobutylicum<br>acidogenic fermentation | PWY-6590       | 0.0137334043088943 | 0.023621455411298<br>2 | 0.000065117088412<br>2546 | 0.000024672901324<br>0846 |
| mandelate degradation to acetyl-CoA                                   | PWY-6957       | 0.0144948923475206 | 0.024751206066343<br>9 | 0.000009750945203<br>477  | 0.000031311734278<br>0283 |
| sucrose biosynthesis III                                              | PWY-7347       | 0.0144948923475206 | 0.024751206066343<br>9 | 0.000031966965126<br>7898 | 0.000094933900569<br>4245 |
| sucrose biosynthesis I (from photosynthesis)                          | SUCSYN-PWY     | 0.0152933710301989 | 0.025927471316430<br>5 | 0.007092388350018<br>34   | 0.007556836031111<br>97   |
| superpathway of phospholipid biosynthesis I<br>(bacteria)             | PHOSLIPSYN-PWY | 0.0152933710301989 | 0.025927471316430<br>5 | 0.005534305541490<br>47   | 0.005948687756377<br>92   |
| superpathway of L-threonine biosynthesis                              | THRESYN-PWY    | 0.0161303221067591 | 0.027248722701775<br>2 | 0.000836237903661<br>83   | 0.001092299315686<br>27   |
| pyruvate fermentation to butanoate                                    | CENTFERM-PWY   | 0.0170072690620831 | 0.028425576912951<br>6 | 0.000296199557242<br>843  | 0.000083770631517<br>7688 |
| chlorophyllide a biosynthesis II (anaerobic)                          | PWY-5531       | 0.0170072690620831 | 0.028425576912951<br>6 | 0.005190578688634<br>09   | 0.006154874700344<br>51   |
| starch degradation V                                                  | PWY-6737       | 0.0170072690620831 | 0.028425576912951<br>6 | 0.000296199557242<br>843  | 0.000083770631517<br>7688 |

|                                                                        |                           |                    |                        |                           |                           |
|------------------------------------------------------------------------|---------------------------|--------------------|------------------------|---------------------------|---------------------------|
| chlorophyllide a biosynthesis III (aerobic, light independent)         | PWY-7159                  | 0.0179257773574065 | 0.029543180104715<br>2 | 0.000026181072458<br>5547 | 0.000050361113598<br>3581 |
| superpathway of lipopolysaccharide biosynthesis                        | LPSSYN-PWY                | 0.0179257773574065 | 0.029543180104715<br>2 | 0.005891021518874<br>57   | 0.004472946539398<br>6    |
| aerobic respiration I (cytochrome c)                                   | PWY-3781                  | 0.0179257773574065 | 0.029543180104715<br>2 | 0.006795904901447<br>99   | 0.007314406544602<br>14   |
| phosphatidylglycerol biosynthesis I (plastidic)                        | PWY4FS-7                  | 0.0179257773574065 | 0.029543180104715<br>2 | 0.006795904901447<br>99   | 0.007314406544602<br>14   |
| phosphatidylglycerol biosynthesis II (non-plastidic)                   | PWY4FS-8                  | 0.0198939507675555 | 0.032673051086992<br>1 | 0.002166172071003<br>63   | 0.001583614787026<br>65   |
| superpathway of &beta;-D-glucuronide and D-glucuronate degradation     | GLUCUROCAT-PWY            | 0.0209469580967318 | 0.034283429687730<br>6 | 0.000051716774181<br>3151 | 0.000058886114903<br>5589 |
| 1,5-anhydrofructose degradation                                        | PWY-6992                  | 0.0220450213562389 | 0.035715081969122<br>3 | 1.79749253119433<br>E-06  | 5.95551385308433<br>E-06  |
| dTDP-D-desosamine biosynthesis                                         | PWY-6942                  | 0.0220482112790353 | 0.035715081969122<br>3 | 0.001765489217863<br>43   | 0.001323201887339<br>32   |
| superpathway of hexuronide and hexuronate degradation                  | GALACT-<br>GLUCUROCAT-PWY | 0.0220482112790353 | 0.035715081969122<br>3 | 0.000855496890496<br>1    | 0.000506783469443<br>296  |
| cob(II)yrinate a,c-diamide biosynthesis II (late cobalt incorporation) | PWY-7376                  | 0.0256558807787127 | 0.041282002967475      | 3.73508044084929<br>E-07  | 0.000012875991869<br>7528 |
| superpathway of pyrimidine ribonucleosides degradation                 | PWY-7209                  | 0.0256594267916229 | 0.041282002967475      | 0.004076160449720<br>98   | 0.003379610938998<br>73   |
| L-tryptophan biosynthesis                                              | TRPSYN-PWY                | 0.0269718544263195 | 0.042955175567842<br>1 | 0.007589430984892<br>38   | 0.007912629486614<br>03   |

|                                                                |                 |                    |                        |                           |                           |
|----------------------------------------------------------------|-----------------|--------------------|------------------------|---------------------------|---------------------------|
| CDP-diacylglycerol biosynthesis I                              | PWY-5667        | 0.0269718544263195 | 0.042955175567842<br>1 | 0.007589430984892<br>38   | 0.007912629486614<br>03   |
| CDP-diacylglycerol biosynthesis II                             | PWY0-1319       | 0.0269718544263195 | 0.042955175567842<br>1 | 0.002975157825821<br>99   | 0.002461966770395<br>23   |
| superpathway of sulfate assimilation and cysteine biosynthesis | SULFATE-CYS-PWY | 0.0283418326973812 | 0.044985526395507<br>8 | 0.002059876154287<br>26   | 0.001507743212804<br>64   |
| sulfate reduction I (assimilatory)                             | SO4ASSIM-PWY    | 0.029771346975724  | 0.046783545247566<br>3 | 0.004574336167253<br>65   | 0.004321568883191<br>65   |
| superpathway of L-methionine biosynthesis (transsulfuration)   | PWY-5347        | 0.029771346975724  | 0.046783545247566<br>3 | 0.000022705440704<br>335  | 0.000033821443028<br>6905 |
| adenosine nucleotides degradation IV                           | PWY-5532        | 0.029771346975724  | 0.046783545247566<br>3 | 0.001787700243049<br>96   | 0.002140212354922<br>37   |
| pyridoxal 5'-phosphate biosynthesis I                          | PYRIDOXYN-PWY   | 0.0312624231206811 | 0.048482380774039<br>9 | 0.000013141305993<br>4326 | 1.55594470027178<br>E-06  |
| phospholipases                                                 | LIPASYN-PWY     | 0.0312624231206811 | 0.048482380774039<br>9 | 0.002341913279563<br>7    | 0.002892400204965<br>3    |
| purine nucleobases degradation I (anaerobic)                   | P164-PWY        | 0.0312624231206811 | 0.048482380774039<br>9 | 0.001357052008411         | 0.000847905237538<br>174  |
| 1,4-dihydroxy-2-naphthoate biosynthesis I                      | PWY-5837        | 0.0312624231206811 | 0.048482380774039<br>9 | 0.000093592178287<br>4719 | 0.000122332535114<br>439  |

**Table S1E.** Relative abundance of the most significant MetaCyc metabolic pathways in the samples collected in periodontitis sites and healthy sites as assessed by Mann-Whitney U tests with false-discovery-rate correction.



| cytokines | genus                                                                                                            | Correlation       | FDR corrected P value |
|-----------|------------------------------------------------------------------------------------------------------------------|-------------------|-----------------------|
| IL-6      | k__Bacteria_p__Actinobacteria_c__Actinobacteria_o__Actinomycetales_f__Microbacteriaceae_g__Salinibacterium       | 0.781058141470492 | 0.00391896335277532   |
| IL-6      | k__Bacteria_p__Actinobacteria_c__Actinobacteria_o__Actinomycetales_f__Nocardoidaceae_g__Propionicimonas          | 0.77387261365315  | 0.00391896335277532   |
| IL-6      | k__Bacteria_p__Proteobacteria_c__Alphaproteobacteria_o__Rhizobiales_f__Xanthobacteraceae_g__Ancylobacter         | 0.781058141470492 | 0.00391896335277532   |
| TNF_alpha | k__Bacteria_p__Proteobacteria_c__Gammaproteobacteria_o__Pseudomonadales_f__Moraxellaceae_g__Psychrobacter        | 0.743367104494179 | 0.0080953860942272    |
| TNF_alpha | k__Bacteria_p__Proteobacteria_c__Gammaproteobacteria_o__Xanthomonadales_f__Xanthomonadaceae_g__Pseudoxanthomonas | 0.743367104494178 | 0.0080953860942272    |
| TNF_alpha | k__Bacteria_p__Firmicutes_c__Bacilli_o__Lactobacillales_f__Carnobacteriaceae_g__Carnobacterium                   | 0.704471475170114 | 0.0260357377017787    |
| IL-6      | k__Bacteria_p__Fusobacteria_c__Fusobacteriia_o__Fusobacteriales_f__g__                                           | 0.682403924137123 | 0.0438746482692848    |

**Table S2A.** Most significant correlations between cytokines and oral microbiome collapsed at genus level in the samples collected in healthy sites as assessed by Pearson correlation with false-discovery-rate correction.

| cytokines | genus                                                                                                 | Correlation       | FDR corrected P value |
|-----------|-------------------------------------------------------------------------------------------------------|-------------------|-----------------------|
| IL-4      | k__Bacteria_p__Actinobacteria_c__Actinobacteria_o__Actinomycetales_f__Actinomycetaceae_g__            | 0.913181895820066 | 2.80808337152153e-07  |
| IL-4      | k__Bacteria_p__Actinobacteria_c__Coriobacteriia_o__Coriobacteriales_f__Coriobacteriaceae_g__Atopobium | 0.917147889369325 | 2.80808337152153e-07  |
| IL-4      | k__Bacteria_p__Firmicutes_c__Clostridia_o__Clostridiales_f__Lachnospiraceae_g__Lachnoanaerobaculum    | 0.866304124952008 | 1.72575647575241e-05  |

|               |                                                                                                                 |                       |                      |
|---------------|-----------------------------------------------------------------------------------------------------------------|-----------------------|----------------------|
| IL-4          | k_Bacteria_p_Proteobacteria_c_Alphaproteobacteria_o_Rhizobiales_f_B<br>radyrhizobiaceae                         | 0.840219451<br>283567 | 8.09320296113803e-05 |
| IL-10         | k_Bacteria_p_Actinobacteria_c_Actinobacteria_o_Actinomycetales_f_Pr<br>opionibacteriaceae g_Propionibacterium   | 0.799843625<br>509915 | 0.000631656205793434 |
| IL-10         | k_Bacteria_p_Firmicutes_c_Bacilli_o_Bacillales_f_Staphylococcaceae_<br>g_Staphylococcus                         | 0.788520300<br>439248 | 0.000910949715131011 |
| IL-10         | k_Bacteria_p_Actinobacteria_c_Actinobacteria_o_Actinomycetales_f_C<br>ellulomonadaceae g_Actinotalea            | 0.782716791<br>377285 | 0.00102134432047806  |
| IL-4          | k_Bacteria_p_Actinobacteria_c_Actinobacteria_o_Actinomycetales_f_Pr<br>opionibacteriaceae g_                    | 0.708536604<br>395631 | 0.0154468691733736   |
| IL-6          | k_Bacteria_p_Proteobacteria_c_Alphaproteobacteria_o_Rhodobacterales_<br>f_Rhodobacteraceae                      | 0.696710762<br>528417 | 0.019988306088363    |
| TNF_a<br>lpha | k_Bacteria_p_Actinobacteria_c_Actinobacteria_o_Actinomycetales_f_A<br>ctinomycetaceae g_Actinomyces             | 0.668454807<br>635251 | 0.0277109389384337   |
| TNF_a<br>lpha | k_Bacteria_p_Firmicutes_c_Bacilli_o_Lactobacillales_f_Carnobacteriac<br>eae g_                                  | 0.663662633<br>943241 | 0.0277109389384337   |
| TNF_a<br>lpha | k_Bacteria_p_Firmicutes_c_Clostridia_o_Clostridiales_f_Clostridiaceae                                           | 0.671428752<br>259426 | 0.0277109389384337   |
| TNF_a<br>lpha | k_Bacteria_p_Firmicutes_c_Clostridia_o_Clostridiales_f_Lachnospirace<br>ae g_Clostridium                        | 0.664095655<br>949535 | 0.0277109389384337   |
| IL-<br>17A    | k_Bacteria_p_Firmicutes_c_Clostridia_o_Clostridiales_f_Veillonellacea<br>e g_Acidaminococcus                    | 0.673094496<br>22526  | 0.0277109389384337   |
| TNF_a<br>lpha | k_Bacteria_p_Fusobacteria_c_Fusobacteriia_o_Fusobacteriales_f_Fusob<br>acteriaceae g_Fusobacterium              | 0.664333340<br>860748 | 0.0277109389384337   |
| IL-6          | k_Bacteria_p_Proteobacteria_c_Betaproteobacteria_o_Neisseriales_f_Ne<br>isseriaceae                             | 0.663890432<br>48005  | 0.0277109389384337   |
| TNF_a<br>lpha | k_Bacteria_p_Proteobacteria_c_Betaproteobacteria_o_Rhodocyclales_f_<br>Rhodocyclaceae g_Propionivibrio          | 0.679586299<br>145746 | 0.0277109389384337   |
| TNF_a<br>lpha | k_Bacteria_p_Bacteroidetes_c_Sphingobacteriia_o_Sphingobacteriales_f_<br>Sphingobacteriaceae g_Sphingobacterium | 0.655905782<br>117121 | 0.0322653625660387   |
| TNF_a<br>lpha | k_Bacteria_p_Proteobacteria_c_Alphaproteobacteria_o_Rhodobacterales_<br>f_Rhodobacteraceae g_Amaricoccus        | 0.646276811<br>080073 | 0.0373568106369682   |

|           |                                                                                                           |                       |                    |
|-----------|-----------------------------------------------------------------------------------------------------------|-----------------------|--------------------|
| IL-17A    | k__Bacteria_p__Proteobacteria_c__Betaproteobacteria_o__Rhodocyclales_f__Rhodocyclaceae_g__Propionivibrio  | 0.647084788<br>419367 | 0.0373568106369682 |
| TNF_alpha | k__Bacteria_p__Actinobacteria_c__Actinobacteria_o__Actinomycetales_f__Microbacteriaceae_g__Microbacterium | 0.639484638<br>392383 | 0.041842599521803  |
| IL-17A    | k__Bacteria_p__Proteobacteria_c__Betaproteobacteria_o__Neisseriales_f__Neisseriaceae                      | 0.638043099<br>536067 | 0.041842599521803  |

**Table S2B.** Most significant correlations between cytokines and oral microbiome collapsed at genus level in the samples collected in periodontitis sites as assessed by Pearson correlation with false-discovery-rate correction.

| cytokines | PATHWAYS                                               | Correlation            | FDR corrected P value |
|-----------|--------------------------------------------------------|------------------------|-----------------------|
| IL-6      | PWY-1882 superpathway of C1 compounds oxidation to CO2 | 0.778140117786349      | 0.0215331440046045    |
| IL-10     | PWY-1861 formaldehyde assimilation II (RuMP Cycle)     | -0.74049363300693      | 0.0498192403823827    |
| IL-10     | RUMP-PWY formaldehyde oxidation I                      | -<br>0.725846352984813 | 0.0563313324492285    |

**Table S2C.** Most significant correlations between cytokines and predicted metagenomic functions (KEGG pathways) in the samples collected in healthy sites as assessed by Pearson correlation with false-discovery-rate correction.

| cytokines | PATHWAYS                                                                | Correlation                                                   | FDR corrected P value |
|-----------|-------------------------------------------------------------------------|---------------------------------------------------------------|-----------------------|
| IL-17A    | BENZCOA-PWY anaerobic aromatic compound degradation (Thauera aromatica) | 0.752822764264593                                             | 0.0606265156466369    |
| IL-6      | PWY-5499 vitamin B6 degradation                                         | 0.735332831719876                                             | 0.0606265156466369    |
| IL-6      | PWY-7402: benzoate fermentation (to acetate and cyclohexanecarboxylate) | benzoate fermentation (to acetate and cyclohexanecarboxylate) | 0.0622478814555644    |

|        |                                                                         |                   |                 |
|--------|-------------------------------------------------------------------------|-------------------|-----------------|
| IL-17A | DENITRIFICATION-PWY nitrate reduction I (denitrification)               | 0.704120083027345 | 0.0702784389741 |
| IL-17A | PWY-7402 benzoate fermentation (to acetate and cyclohexane carboxylate) | 0.705471289009918 | 0.0702784389741 |

**Table S2D.** Most significant correlations between cytokines and predicted metagenomic functions (KEGG pathways) in the samples collected in periodontitis sites as assessed by Pearson correlation with false-discovery-rate correction.

| ENZYMES   | ENZYMES names                         | cytokines | Correlation       | FDR corrected P value |
|-----------|---------------------------------------|-----------|-------------------|-----------------------|
| 1.1.2.7   | Methanol dehydrogenase (cytochrome c) | IL-6      | 0.773298386832442 | 0.0602654641172393    |
| 1.14.19.4 | Delta(8)-fatty-acid desaturase        | IL-6      | 0.759263905392162 | 0.0602654641172393    |
| 3.4.23.49 | Omptin                                | IL-6      | 0.779864140905324 | 0.0602654641172393    |
| 4.1.2.55  | aldolase                              | IL-6      | 0.758808375620779 | 0.0602654641172393    |
| 4.2.1.66  | Cyanide hydratase                     | IL-6      | 0.759263905392162 | 0.0602654641172393    |

**Table S2E.** Most significant correlations between cytokines and predicted metagenomic functions (Enzyme Commission) in the samples collected in healthy sites as assessed by Pearson correlation with false-discovery-rate correction.

| ENZYMES   | ENZYMES names                                              | cytokines | Correlation       | FDR corrected P value |
|-----------|------------------------------------------------------------|-----------|-------------------|-----------------------|
| 1.1.1.105 | All-trans-retinol dehydrogenase (NAD(+))                   | IL-4      | 0.869243233182877 | 0.000310357115539233  |
| 2.3.2.17  | glycyltransferase                                          | IL-4      | 0.875337744439791 | 0.000310357115539233  |
| 3.5.3.25  | N(omega)-hydroxy-L-arginine amidinohydrolase               | IL-4      | 0.83548087667382  | 0.0021944621149222    |
| 1.14.16.1 | Phenylalanine 4-monooxygenase                              | IL-17A    | 0.826476037589159 | 0.00282911021140912   |
| 1.3.1.75  | Divinyl chlorophyllide a 8-vinyl-reductase                 | IL-6      | 0.797171936216008 | 0.0108841160838587    |
| 1.14.13.9 | Kynurenine 3-monooxygenase                                 | TNF_alpha | 0.777746252700735 | 0.0182933718653553    |
| 1.3.8.2   | 4,4'-diapophytoene desaturase (4,4'-diapolycopene-forming) | IL-10     | 0.768546994701519 | 0.0182933718653553    |

|             |                                                   |           |                   |                    |
|-------------|---------------------------------------------------|-----------|-------------------|--------------------|
| 1.8.1.14    | CoA-disulfide reductase                           | IL-10     | 0.768546993690475 | 0.0182933718653553 |
| 2.3.2.18    | glycyltransferase                                 | IL-4      | 0.773350766173424 | 0.0182933718653553 |
| 2.5.1.96    | 4,4'-diapophytoene synthase                       | IL-10     | 0.768546994552137 | 0.0182933718653553 |
| 3.1.27.6    | Enterobacter ribonuclease                         | IL-6      | 0.778650981191651 | 0.0182933718653553 |
| 1.10.2.2    | Quinol--cytochrome-c reductase                    | IL-17A    | 0.75088023364689  | 0.0242933073163435 |
| 1.5.1.36    | Flavin reductase (NADH)                           | IL-6      | 0.753389316525921 | 0.0242933073163435 |
| 1.7.2.4     | Nitrous-oxide reductase                           | IL-17A    | 0.751903404506183 | 0.0242933073163435 |
| 2.3.1.207   | Beta-ketodecanoyl-[acyl-carrier-protein] synthase | TNF_alpha | 0.756946660085144 | 0.0242933073163435 |
| 2.8.3.21    | L-carnitine CoA-transferase                       | IL-4      | 0.75236649952096  | 0.0242933073163435 |
| 4.2.1.12    | Phosphogluconate dehydratase                      | IL-6      | 0.752089958274913 | 0.0242933073163435 |
| 3.4.21.72   | IgA-specific serine endopeptidase                 | IL-6      | 0.74458192422656  | 0.0292351909194497 |
| 1.17.1.1    | CDP-4-dehydro-6-deoxyglucose reductase            | IL-6      | 0.734277826214766 | 0.0405800309771708 |
| 1.2.1.68    | Coniferyl-aldehyde dehydrogenase                  | TNF_alpha | 0.725785181933035 | 0.0521493291506078 |
| 2.3.2.5     | Glutaminy-peptide cyclotransferase                | TNF_alpha | 0.718330708180412 | 0.0599002396009973 |
| 2.4.1.5     | Dextranucrase                                     | TNF_alpha | 0.717679891195155 | 0.0599002396009973 |
| 4.2.1.53    | Oleate hydratase                                  | TNF_alpha | 0.718342687694091 | 0.0599002396009973 |
| 4.2.1.57    | Isohexenylglutaconyl-CoA hydratase                | TNF_alpha | 0.711890489569407 | 0.0696334110066253 |
| 1.1.5.8     | Quinate dehydrogenase (quinone)                   | TNF_alpha | 0.703355626100141 | 0.0816112171008318 |
| 3.3.2.1     | Isochorismatase                                   | TNF_alpha | 0.704536885969368 | 0.0816112171008318 |
| 3.5.1.96    | Succinylglutamate desuccinylase                   | TNF_alpha | 0.703558895079998 | 0.0816112171008318 |
| 2.1.1.67    | Thiopurine S-methyltransferase                    | TNF_alpha | 0.700895777046166 | 0.0850759035649384 |
| 1.1.3.12    | Pyridoxine 4-oxidase                              | IL-6      | 0.694091396743781 | 0.0905060814470634 |
| 1.14.13.131 | Dimethyl-sulfide monooxygenase                    | IL-6      | 0.694688764899713 | 0.0905060814470634 |
| 1.2.1.72    | Erythrose-4-phosphate dehydrogenase               | TNF_alpha | 0.695793119570367 | 0.0905060814470634 |
| 2.1.3.1     | Methylmalonyl-CoA carboxytransferase              | IL-6      | 0.692642965310999 | 0.0905060814470634 |

|            |                                                 |           |                   |                    |
|------------|-------------------------------------------------|-----------|-------------------|--------------------|
| 5.3.1.26   | Galactose-6-phosphate isomerase                 | IL-6      | 0.696249620980044 | 0.0905060814470634 |
| 5.3.3.8    | Dodecenoyl-CoA isomerase                        | TNF_alpha | 0.692893829833396 | 0.0905060814470634 |
| 1.1.1.67   | Mannitol 2-dehydrogenase                        | TNF_alpha | 0.688250398965159 | 0.0925809501551899 |
| 1.14.11.19 | Leucocyanidin oxygenase                         | TNF_alpha | 0.673481630066119 | 0.0925809501551899 |
| 1.14.12.14 | 2-aminobenzenesulfonate 2,3-dioxygenase         | TNF_alpha | 0.673481630066139 | 0.0925809501551899 |
| 1.14.15.9  | Spheroidene monooxygenase                       | IL-6      | 0.68784471866614  | 0.0925809501551899 |
| 1.16.1.3   | Aquacobalamin reductase                         | TNF_alpha | 0.687012423909958 | 0.0925809501551899 |
| 1.17.5.1   | Phenylacetyl-CoA dehydrogenase                  | TNF_alpha | 0.673461370768913 | 0.0925809501551899 |
| 1.18.1.6   | Adrenodoxin-NADP(+) reductase                   | TNF_alpha | 0.673482137546604 | 0.0925809501551899 |
| 1.3.1.19   | Cis-1,2-dihydrobenzene-1,2-diol dehydrogenase   | TNF_alpha | 0.681887070958801 | 0.0925809501551899 |
| 1.3.1.62   | Pimeloyl-CoA dehydrogenase                      | TNF_alpha | 0.674271020293024 | 0.0925809501551899 |
| 1.4.9.2    | Aralkylamine dehydrogenase (azurin)             | TNF_alpha | 0.673480929371479 | 0.0925809501551899 |
| 1.5.1.37   | FAD reductase (NADH)                            | TNF_alpha | 0.673481620408504 | 0.0925809501551899 |
| 1.5.1.41   | Riboflavin reductase (NAD(P)H)                  | TNF_alpha | 0.687012423909958 | 0.0925809501551899 |
| 2.1.1.174  | 23S rRNA (guanine(1835)-N(2))-methyltransferase | TNF_alpha | 0.68424502819233  | 0.0925809501551899 |
| 2.1.1.187  | 23S rRNA (guanine(745)-N(1))-methyltransferase  | TNF_alpha | 0.685403930557047 | 0.0925809501551899 |
| 2.3.1.230  | 2-heptyl-4(1H)-quinolone synthase               | TNF_alpha | 0.674479269437082 | 0.0925809501551899 |
| 2.5.1.39   | 4-hydroxybenzoate polyprenyltransferase         | IL-6      | 0.680331190099643 | 0.0925809501551899 |
| 2.7.1.89   | Thiamine kinase                                 | TNF_alpha | 0.680626041302477 | 0.0925809501551899 |
| 2.7.11.5   | [Isocitrate dehydrogenase (NADP(+))]<br>kinase  | TNF_alpha | 0.682515078565384 | 0.0925809501551899 |
| 2.7.7.58   | (2,3-dihydroxybenzoyl)adenylate synthase        | TNF_alpha | 0.688588475577676 | 0.0925809501551899 |
| 3.1.1.56   | Methylumbelliferyl-acetate deacetylase          | TNF_alpha | 0.67313064148987  | 0.0925809501551899 |
| 3.1.1.84   | Cocaine esterase                                | TNF_alpha | 0.67313064148987  | 0.0925809501551899 |
| 3.1.2.21   | Dodecanoyl-[acyl-carrier-protein] hydrolase     | TNF_alpha | 0.680514697309054 | 0.0925809501551899 |
| 3.1.2.25   | Phenylacetyl-CoA hydrolase                      | TNF_alpha | 0.673461370768913 | 0.0925809501551899 |

|           |                                                  |           |                   |                    |
|-----------|--------------------------------------------------|-----------|-------------------|--------------------|
| 3.11.1.3  | Phosphonopyruvate hydrolase                      | TNF_alpha | 0.67348150156595  | 0.0925809501551899 |
| 4.1.3.45  | 3-hydroxybenzoate synthase                       | TNF_alpha | 0.677704069620328 | 0.0925809501551899 |
| 3.6.3.33  | Vitamin B12-transporting ATPase                  | TNF_alpha | 0.672457923991846 | 0.0927878998168351 |
| 2.6.1.87  | UDP-4-amino-4-deoxy-L-arabinose aminotransferase | TNF_alpha | 0.670344055081281 | 0.0937888980299378 |
| 2.7.1.13  | Dehydrogluconokinase                             | TNF_alpha | 0.670492432188585 | 0.0937888980299378 |
| 2.7.11.26 | [Tau protein] kinase                             | TNF_alpha | 0.671428167068617 | 0.0937888980299378 |
| 2.7.1.73  | Inosine kinase                                   | TNF_alpha | 0.669243977655225 | 0.0939098900666312 |
| 3.5.1.38  | Glutamin-(asparagin-)ase                         | TNF_alpha | 0.669181301430355 | 0.0939098900666312 |
| 2.7.1.8   | Glucosamine kinase                               | TNF_alpha | 0.66778349651648  | 0.0955178620089822 |
| 4.2.2.3   | Poly(beta-D-mannuronate) lyase                   | TNF_alpha | 0.667482893520241 | 0.0955178620089822 |
| 1.1.1.43  | Phosphogluconate 2-dehydrogenase                 | TNF_alpha | 0.664517950891738 | 0.099221005104641  |
| 3.1.1.74  | Cutinase                                         | IL-10     | 0.665054152486899 | 0.099221005104641  |
| 3.4.24.20 | Peptidyl-Lys metalloendopeptidase                | TNF_alpha | 0.664636714155371 | 0.099221005104641  |

**Table S2F.** Most significant correlations between cytokines and predicted metagenomic functions (Enzyme Commission) in the samples collected in periodontitis sites as assessed by Pearson correlation with false-discovery-rate correction.
